# Supplementary material for: Interventions to reduce the incidence of surgical site infection in colorectal resections: systematic review with multicomponent network meta-analysis (INTRISSI): study protocol
Source: PubMed Central journal article supplement — BMJ Open. 2021 Nov 25;11(11):e057226. doi: 10.1136/bmjopen-2021-057226 (PMC8627408; doi:10.1136/bmjopen-2021-057226), 2021-11-25
Supplement: bmjopen-2021-057226.draft_revisions.pdf [file bmjopen-2021-057226.draft_revisions.pdf]

# BMJ Open

BMJ Open is committed to open peer review. As part of this commitment we make the peer review history of every article we publish publicly available.

When an article is published we post the peer reviewers' comments and the authors' responses online. We also post the versions of the paper that were used during peer review. These are the versions that the peer review comments apply to.

The versions of the paper that follow are the versions that were submitted during the peer review process. They are not the versions of record or the final published versions. They should not be cited or distributed as the published version of this manuscript.

BMJ Open is an open access journal and the full, final, typeset and author-corrected version of record of the manuscript is available on our site with no access controls, subscription charges or pay-per-view fees (<http://bmjopen.bmj.com>).

If you have any questions on BMJ Open's open peer review process please email [info.bmjopen@bmj.com](mailto:info.bmjopen@bmj.com)

# BMJ Open

## INterventions to Reduce the Incidence of Surgical Site Infection in colorectal resections: systematic review with multicomponent network meta-analysis (INTRISSI) – study protocol

|                               |                                                                                                                                                                                                                                                                                                                                                                                                                                                                                                                                                                                                                                                                                                                                                                                                                                                                                                                                                                                                                                                                                                                                                                               |
|-------------------------------|-------------------------------------------------------------------------------------------------------------------------------------------------------------------------------------------------------------------------------------------------------------------------------------------------------------------------------------------------------------------------------------------------------------------------------------------------------------------------------------------------------------------------------------------------------------------------------------------------------------------------------------------------------------------------------------------------------------------------------------------------------------------------------------------------------------------------------------------------------------------------------------------------------------------------------------------------------------------------------------------------------------------------------------------------------------------------------------------------------------------------------------------------------------------------------|
| Journal:                      | <i>BMJ Open</i>                                                                                                                                                                                                                                                                                                                                                                                                                                                                                                                                                                                                                                                                                                                                                                                                                                                                                                                                                                                                                                                                                                                                                               |
| Manuscript ID                 | bmjopen-2021-057226                                                                                                                                                                                                                                                                                                                                                                                                                                                                                                                                                                                                                                                                                                                                                                                                                                                                                                                                                                                                                                                                                                                                                           |
| Article Type:                 | Protocol                                                                                                                                                                                                                                                                                                                                                                                                                                                                                                                                                                                                                                                                                                                                                                                                                                                                                                                                                                                                                                                                                                                                                                      |
| Date Submitted by the Author: | 08-Sep-2021                                                                                                                                                                                                                                                                                                                                                                                                                                                                                                                                                                                                                                                                                                                                                                                                                                                                                                                                                                                                                                                                                                                                                                   |
| Complete List of Authors:     | <p>Friedrichs, Juliane; Martin Luther University of Halle Wittenberg Faculty of Medicine, Department of Visceral, Vascular and Endocrine Surgery Seide, Svenja; Ruprecht Karls Universitat Heidelberg, Institute of Medical Biometry</p> <p>Vey, Johannes; University Hospital Heidelberg, Germany, Institute of Medical Biometry</p> <p>Zimmermann, Samuel; University Hospital Heidelberg, Institute of Medical Biometry</p> <p>Hardt, Julia; University Medical Centre Mannheim Department of Surgery</p> <p>Kleeff, Joerg; University Hospital Halle (Saale), Department of Visceral, Vascular and Endocrine Surgery</p> <p>Klose, Johannes; University Hospital Halle (Saale), Department of Visceral, Vascular and Endocrine Surgery</p> <p>Michalski, Christoph; Universitatsklinikum Halle, Department of Visceral, Vascular and Endocrine Surgery</p> <p>Kieser, Meinhard; University Hospital Heidelberg, Institute of Medical Biometry</p> <p>Pilz, Maximilian; University Hospital Heidelberg, Institute of Medical Biometry</p> <p>Ronellenfitsch, Ulrich; Martin Luther University Halle Wittenberg, Department of Visceral, Vascular and Endocrine Surgery</p> |
| Keywords:                     | Colorectal surgery < SURGERY, STATISTICS & RESEARCH METHODS, Adverse events < THERAPEUTICS                                                                                                                                                                                                                                                                                                                                                                                                                                                                                                                                                                                                                                                                                                                                                                                                                                                                                                                                                                                                                                                                                    |
|                               |                                                                                                                                                                                                                                                                                                                                                                                                                                                                                                                                                                                                                                                                                                                                                                                                                                                                                                                                                                                                                                                                                                                                                                               |

SCHOLARONE™  
Manuscripts

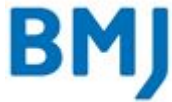

I, the Submitting Author has the right to grant and does grant on behalf of all authors of the Work (as defined in the below author licence), an exclusive licence and/or a non-exclusive licence for contributions from authors who are: i) UK Crown employees; ii) where BMJ has agreed a CC-BY licence shall apply, and/or iii) in accordance with the terms applicable for US Federal Government officers or employees acting as part of their official duties; on a worldwide, perpetual, irrevocable, royalty-free basis to BMJ Publishing Group Ltd ("BMJ") its licensees and where the relevant Journal is co-owned by BMJ to the co-owners of the Journal, to publish the Work in this journal and any other BMJ products and to exploit all rights, as set out in our [licence](#).

The Submitting Author accepts and understands that any supply made under these terms is made by BMJ to the Submitting Author unless you are acting as an employee on behalf of your employer or a postgraduate student of an affiliated institution which is paying any applicable article publishing charge ("APC") for Open Access articles. Where the Submitting Author wishes to make the Work available on an Open Access basis (and intends to pay the relevant APC), the terms of reuse of such Open Access shall be governed by a Creative Commons licence – details of these licences and which [Creative Commons](#) licence will apply to this Work are set out in our licence referred to above.

Other than as permitted in any relevant BMJ Author's Self Archiving Policies, I confirm this Work has not been accepted for publication elsewhere, is not being considered for publication elsewhere and does not duplicate material already published. I confirm all authors consent to publication of this Work and authorise the granting of this licence.

**INterventions to Reduce the Incidence of Surgical Site Infection in colorectal resections: systematic review with multicomponent network meta-analysis (INTRISSI) – study protocol**

| <b><u>Author</u></b>  | <b><u>Affiliation</u></b>                                                                                                          | <b><u>Email</u></b>                                                                                                                                                                                                                      |
|-----------------------|------------------------------------------------------------------------------------------------------------------------------------|------------------------------------------------------------------------------------------------------------------------------------------------------------------------------------------------------------------------------------------|
| Juliane Friedrichs    | University Hospital Halle (Saale), Germany, Department of Visceral, Vascular and Endocrine Surgery                                 | juliane.friedrichs@uk-halle.de                                                                                                                                                                                                           |
| Svenja E. Seide       | Review Statistician, University Hospital Heidelberg, Germany, Institute of Medical Biometry, Heidelberg, Germany                   | seide@imbi.uni-heidelberg.de                                                                                                                                                                                                             |
| Johannes A. Vey       | Review Statistician, University Hospital Heidelberg, Germany, Institute of Medical Biometry, Heidelberg, Germany                   | vey@imbi.uni-heidelberg.de                                                                                                                                                                                                               |
| Samuel Zimmermann     | Statistician, University Hospital Heidelberg, Germany, Institute of Medical Biometry, Heidelberg, Germany                          | zimmermann@imbi.uni-heidelberg.de                                                                                                                                                                                                        |
| Julia Hardt           | Surgeon, University Medical Center Mannheim, Dpt. of Surgery                                                                       | Julia.hardt@umm.de                                                                                                                                                                                                                       |
| Jörg Kleeff           | University Hospital Halle (Saale), Germany, Department of Visceral, Vascular and Endocrine Surgery                                 | joerg.kleeff@uk-halle.de                                                                                                                                                                                                                 |
| Johannes Klose        | University Hospital Halle (Saale), Germany, Department of Visceral, Vascular and Endocrine Surgery                                 | Johannes.Klose@uk-halle.de                                                                                                                                                                                                               |
| Christoph Michalski   | University Hospital Halle (Saale), Germany, Department of Visceral, Vascular and Endocrine Surgery                                 | Christoph.Michalski@uniklinik-ulm.de                                                                                                                                                                                                     |
| Meinhard Kieser       | Statistical expert, University Hospital Heidelberg, Germany, Institute of Medical Biometry, Heidelberg, Germany                    | kieser@imbi.uni-heidelberg.de                                                                                                                                                                                                            |
| Maximilian Pilz       | Statistician, University Hospital Heidelberg, Germany, Institute of Medical Biometry, Heidelberg, Germany                          | pilz@imbi.uni-heidelberg.de                                                                                                                                                                                                              |
| Ulrich Ronellenfitsch | Clinical scientist and Surgeon, University Hospital Halle (Saale), Germany, Department of Visceral, Vascular and Endocrine Surgery | Ulrich.Ronellenfitsch@uk-halle.de<br><br>Corresponding address:<br>Universitätsklinik und Poliklinik für Viszerale, Gefäß- und Endokrine Chirurgie<br>Universitätsklinikum Halle (Saale)<br>Ernst-Grube-Straße 40<br>06120 Halle (Saale) |

1  
2  
3 **Interventions to Reduce the Incidence of Surgical Site Infection in colorectal**  
4 **resections: systematic review with multicomponent network meta-analysis**  
5 **(INTRISSI) – study protocol**  
6  
7  
8  
9

10 Juliane Friedrichs, Johannes A. Vey, Svenja E. Seide, Maximilian Pilz, Samuel Zimmermann,  
11 Julia Hardt, Jörg Kleeff, Johannes Klose, Christoph Michalski, Meinhard Kieser, Ulrich  
12 Ronellenfitsch  
13  
14

15  
16  
17 **Abstract**  
18

19 **Objective** To assess the relative contribution of intravenous antibiotic prophylaxis, mechanical  
20 bowel preparation, oral antibiotic prophylaxis, and combinations thereof towards the  
21 reduction of surgical site infection (SSI) incidence in elective colorectal resections.  
22  
23

24 **Methods and Analysis** Multicomponent network meta-analysis using machine learning based  
25 screening. A systematic search of randomised controlled trials (RCTs) comparing interventions  
26 to reduce SSI incidence will be conducted with predefined search terms in the following  
27 databases: MEDLINE, LILACS, Cochrane Central Register of Controlled Trials (CENTRAL), and  
28 the Cochrane Database of Systematic Reviews (CDSR). Additionally, several online databases  
29 will be searched for ongoing trials, and conference proceedings and reference lists of retrieved  
30 articles will be hand-searched. The title-abstract screening will be partly performed by means  
31 of a semi-automated supervised machine learning approach, which will be trained on a subset  
32 of the identified titles and abstracts identified through traditional screening methods.  
33  
34  
35

36  
37 The primary analysis will be a multicomponent network meta-analysis, as we expect to identify  
38 studies that investigate combinations of interventions (e.g. mechanical bowel preparation  
39 combined with oral antibiotics), as well as studies that focus on individual components  
40 (mechanical bowel preparation or oral antibiotics). By means of a multicomponent network  
41 meta-analysis we aim at estimating the effects of the separate components along the effects  
42 of the observed combinations. To account for between-trial heterogeneity, a random-effects  
43 approach will be combined with inverse variance weighting for estimation of the treatment  
44 effects. Associated 95% CIs will be calculated as well as the ranking for each component in the  
45 network using P-Scores. Visualisation will be done by network graphics and forest plots of the  
46 overall pairwise effect estimates. Comparison adjusted funnel-plots will be used to assess  
47 publication bias.  
48  
49  
50

51 **Ethics and Dissemination** Ethical approval by the Ethical Committee of the Medical Faculty  
52 of the Martin-Luther-University Halle-Wittenberg (ID of approval: 2021-148).  
53  
54

55 **Trial registration number** registered at Prospero (ID: CRD42021267322)  
56  
57  
58  
59  
60

**Strength and limitations of this study:**

- Literature screening is supported by machine learning, which is a new and highly innovative technique saving work and time.
- The multicomponent network meta-analysis integrates and compares all available evidence on how effective the different interventions are in preventing SSIs.
- Results will be rated and discussed with patient representatives
- No individual patient data will be available from trials.

**Introduction**

Colorectal resections are some of the most frequently performed operations in abdominal surgery. For 2018, in Germany, the annual number of colorectal resections for all causes reached 350,803<sup>1</sup>. Due to the microbiome inherent to the colon and rectum, postoperative surgical site infections (SSIs) are a frequent problem. According to the commonly used definition of the Centres for Disease Control (CDC), they comprise infections of the incision, fascia and muscle layer, or the organ space<sup>2</sup>. It is estimated that SSIs occur in up to 40% of colorectal resections<sup>3</sup>, amounting to approximately 130,000 annual cases of SSI in Germany alone<sup>4</sup>.

SSIs have a relevant impact on both patients and health care systems. Depending on severity, they require additional interventions, prolong the hospital stay, increase treatment and societal costs, negatively impact quality of life, lead to temporary or permanent disability, or can even be life threatening. The median prolongation of hospital stays due to SSIs after colorectal surgery is estimated to be seven days<sup>5</sup>, and the quality adjusted life years (QALYs) lost for patients suffering an SSI 0.93<sup>6</sup>. The cost of an SSI is estimated at around 30,000 USD in the USA<sup>6</sup> and between 926 and 65,114 Euro in Germany<sup>7</sup>.

Several interventions have been used with the aim of reducing the SSI risk in elective colorectal resections. However, the evidence is conflicting and to some aspects contradictory. Intravenous antibiotics prior to skin incision are considered indispensable based on high-level evidence from studies comparing it to no intravenous antibiotic administration<sup>3</sup>. Mechanical bowel preparation (MBP) using a drinkable cleansing solution has been assessed in a recent meta-analysis comprising both RCTs and observational studies. It failed to show a lower SSI incidence in patients receiving MBP<sup>8</sup>. There is evidence that oral antibiotic prophylaxis (OAP) in combination with MBP prior to resection reduces SSI incidence to a larger extent than MBP alone<sup>9</sup>. This has led to the recommendation of the combination in the WHO guidelines for SSI prevention<sup>10</sup>. Yet, when compared to intravenous antibiotic prophylaxis, OAP is associated with higher SSI incidence<sup>11</sup>. A recent meta-analysis aimed at assessing the impact of OAP with or without MBP compared with different other prophylactic strategies on the incidence of SSI and other postoperative complications<sup>12</sup>. The authors concluded that OAP is associated with lower SSI incidence. However, the interpretation of the results is limited because no network meta-analysis was done. This methodology was applied by Toh et al. for a comparison of

1  
2  
3 different prophylactic interventions<sup>13</sup>. The analysis found that MBP with OAP was associated  
4 with the lowest SSI risk compared to OAB alone, MBP alone or no preparation. However, the  
5 effect of intravenous antibiotics was not assessed and the methods used did not allow  
6 calculating the relative contribution of the single interventions to the observed effects.  
7  
8

9 In summary, there is substantial evidence comparing different interventions and combinations  
10 thereof for SSI prevention in elective colorectal surgery. Yet, no comprehensive analysis of this  
11 evidence using appropriate methods for discerning the true effects of the single interventions  
12 or combinations has been done so far. Traditional network meta-analysis approaches either  
13 lump such combinations into classes of treatments with high variation between studies  
14 contributing information, or treat all combinations as separate nodes by splitting the network.  
15 Recently, an approach developed for network meta-analysis of multi-component  
16 interventions<sup>14</sup> has been formalized<sup>15</sup>. This multi-component network meta-analysis (CNMA)  
17 estimates the separate components of which treatments consist, e.g., MBP, intravenous  
18 antibiotics, and OAP, along with treatment combinations actually used in identified RCTs.  
19 CNMA is therefore the only approach that allows estimating treatment effects of a given  
20 component relative to a reference component, of combinations of components compared to  
21 a reference component, and of all possible treatment contrasts based on the estimation  
22 results and the network structure. It is the only method which can validly answer the research  
23 question regarding SSI prevention in elective colorectal resection.  
24  
25  
26  
27  
28

29 Another important aspect targeted by this study is the burdensome and time-consuming title  
30 abstract screening in systematic reviews. Although machine learning has developed rapidly in  
31 recent years and has been proposed for usage in systematic reviews<sup>16-18</sup>, there is only a limited  
32 number of studies actually applying text-mining in combination with supervised learning in  
33 medical research<sup>17 19</sup>. The project evaluates the practicability of applying natural language  
34 processing procedures and machine learning techniques to abstract screening in the scope of  
35 a real-world example. We aim at providing a standardized workflow to support abstract  
36 screening with advanced machine learning techniques.  
37  
38  
39

## 40 **Methods and Analysis**

### 41 **Search strategies and information sources**

42  
43 A computer-based literature search will be performed in several databases, including the  
44 Cochrane Central Register of Controlled Trials (CENTRAL), Cochrane Database of Systematic  
45 Reviews (CDSR) from The Cochrane Library, MEDLINE (1966 to present), LILACS (Literatura  
46 Latinoamericana y del Caribe en Ciencias de la Salud), Current Contents / Clinical Medicine  
47 (1990 to present) and Web of Science (1945 to present). The search will be limited to studies  
48 in humans. No language restrictions will apply. The Cochrane Highly Sensitive Search Strategy  
49 for identifying randomised trials in MEDLINE, Sensitivity maximizing version, NCBI Platform,  
50 will be employed with predefined search terms. It will be adapted for the other databases  
51 searched. Moreover, the following online databases of ongoing trials will be searched:  
52 [www.clinicaltrials.nci.nih.gov](http://www.clinicaltrials.nci.nih.gov); [www.centerwatch.com](http://www.centerwatch.com); [www.trialscentral.org](http://www.trialscentral.org);  
53 [www.controlledtrials.com](http://www.controlledtrials.com); [www.eortc.be](http://www.eortc.be); [www.studien.de](http://www.studien.de); and [www.germanctr.de](http://www.germanctr.de).  
54 Reference lists of retrieved articles will be scanned for further eligible trials (backward search)  
55  
56  
57  
58  
59  
60



1  
2  
3 and citations of identified trials will be checked for inclusion (forward search). Experts in the  
4 field will be contacted about any unpublished or ongoing studies  
5

### 6 **Study selection**

7  
8 This CNMA is limited to RCTs, which are the only study design able to provide unbiased  
9 evidence for the research question. Due to the nature of the interventions and comparator  
10 under study, blinding of either the patient or the treating physician is not possible for all  
11 interventions and is therefore not considered an in- or exclusion criterion. There are no  
12 restrictions regarding minimal follow-up time or study size.  
13  
14

15  
16 Study selection will be partly performed using machine learning (ML) methods in a semi-  
17 automated screening procedure due to the large number of citations expected from our  
18 search strategy. First, the identified studies will be randomized into three data sets: training  
19 data set, validation data set, and screening data set, with equal sizes of 33.3%. In the training  
20 set, two independent reviewers will assess title, keywords, and abstracts of all retrieved  
21 studies and decide which studies are included into the systematic review. Any disagreements  
22 will be resolved by consensus or consultation with a third reviewer.  
23  
24

25  
26 For the purpose of computer-based text classification based on the abstracts, the texts will be  
27 pre-processed to achieve consistent format by means of various cleaning approaches, such as  
28 transformation to lower case and removing punctuation, symbols, numbers, and stop words.  
29 Text reduction will be performed by using stemming techniques and a document-term matrix  
30 will be created as input for the ML methods. Three ML methods will be applied independently  
31 to predict whether a particular study is included into the systematic review or not. Those  
32 methods are regularized logistic regression<sup>20</sup>, kernel-based support vector machines<sup>21</sup>, and  
33 tree-based random forests<sup>22</sup>. These three approaches stem from different sectors of ML and,  
34 therefore a wide range of methods is covered. If appropriate, the number of applied  
35 algorithms can be extended, e.g., if no sufficiently high performance can be achieved by at  
36 least one of these algorithms. After tuning the algorithms using repeated cross-validation, the  
37 ML techniques in the validation set will be assessed by using the AUC (area under the curve)  
38 as performance measure. To consider the imbalanced class distribution, the Precision-Recall  
39 (PR) curve<sup>23</sup> will be applied additional to the Receiver Operating Characteristics (ROC) curve  
40 to computing the AUC. The corresponding PR and ROC curve will be plotted and key numbers  
41 such as the AUC, sensitivity, specificity, accuracy, and the worked saved over sampling (WSS)<sup>24</sup>  
42 will be reported to evaluate the algorithms' quality. Per algorithm, the 10% of citations with  
43 the largest difference between human decision (0 or 1 for exclude or include) and the  
44 predicted (continuous) inclusion probability will be identified and the validity of human-based  
45 and algorithm-based decisions will be re-evaluated. This procedure will be repeated by adding  
46 a further 10% of unseen, randomly selected citations to the training set. If the performance of  
47 at least one ML algorithm is deemed acceptable, the citations in the screening set need to be  
48 screened by only one human and the second reviewer is replaced by the best-performing ML  
49 method. For all citations identified as eligible in title-abstract screening, full-text will be  
50 retrieved and scrutinized by two independent reviewers. Any disagreements will be resolved  
51 by consensus, or by consultation with a third reviewer. The entire process of study retrieval,  
52  
53  
54  
55  
56  
57  
58  
59  
60



1  
2  
3 in- and exclusion will be displayed in a flowchart as stipulated by the PRISMA-NMA statement  
4 25.  
5

### 6 **Population**

7  
8 To be included, trials need to be conducted on patients undergoing elective, i.e. non-  
9 emergent, planned, colorectal resection. Resection will be defined as removal of at least a  
10 segment of the colon or rectum, with or without primary anastomosis and with or without  
11 protective ostomy placement. There will be no limitations regarding the underlying disease  
12 constituting the indication for resection. Thus, both malignant diseases such as colon cancer,  
13 and benign diseases such as diverticulitis, will be included.  
14  
15

### 16 **Intervention(s)**

17  
18 (1) intravenous antibiotic prophylaxis,  
19  
20 (2) mechanical bowel preparation (MBP),  
21  
22 (3) oral antibiotic prophylaxis (OAP),  
23  
24 or any combination of (1), (2), and (3)  
25  
26

### 27 **Comparator(s)**

28  
29 No intervention, defined as the absence of any of (1), (2), or (3).  
30

31 To be included in this CNMA, trials must either compare any of the interventions or  
32 combinations thereof directly with another or with no intervention or combinations thereof;  
33 or one of the trial arms must be the comparator. A network like the one illustrated in Figure  
34 1A is expected to be identified in the systematic literature review. In that network, the  
35 treatment nodes are defined mostly by combinations of separate treatment components and  
36 the estimation results need to be interpreted as treatment interaction effects. Besides these  
37 interaction effects, the treatment effects for the separate components by means of CNMA will  
38 also be estimated, which is visualized in Figure 1B.  
39  
40  
41  
42  
43  
44  
45  
46  
47  
48  
49  
50  
51  
52  
53  
54  
55  
56  
57  
58  
59  
60

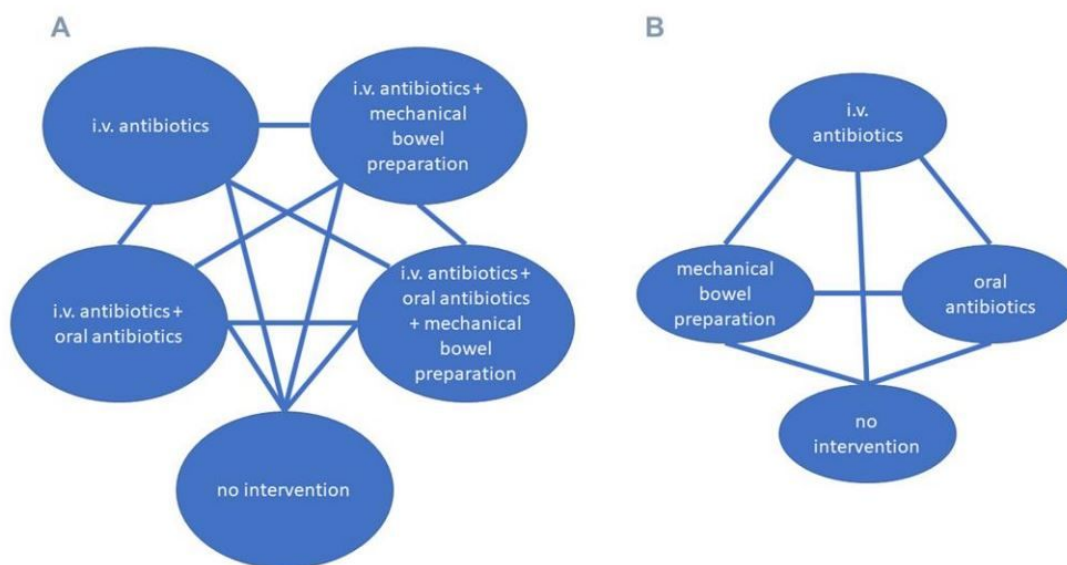

**Figure 1:** A) Network of treatment combinations expected to be identified through the systematic review.  
B) Network of separate components that will be estimated through the CNMA

## Outcomes

The primary outcome will be SSI of any severity.

Secondary outcomes will be:

- severity of SSI according to the CDC classification (superficial, deep incisional, organ space)<sup>2</sup>
- anastomotic failure
- ileus
- clostridium difficile infection
- postoperative mortality
- postoperative morbidity (any in-hospital complication classified as Clavien-Dindo grade I-IV<sup>26</sup> or with a comparable classification);
- re-operation
- hospital re-admission
- hospital length of stay
- postoperative length of stay
- quality of life (as measured in the single studies)

SSI is the pre-specified primary outcome because a direct effect of the tested interventions is assumed.

1  
2  
3 As detailed in section “Patient involvement”, patient representatives will rank subjective  
4 importance of the available secondary outcomes. These rankings will be used to identify highly  
5 patient-relevant outcomes on which we will place special emphasis in the interpretation and  
6 discussion of results. Regardless of this ranking, the different outcomes reflect different  
7 aspects of the clinical course and potential complications following colorectal resection. SSI is  
8 commonly classified into three severity grades<sup>2</sup>. The tested interventions might have different  
9 effects on SSI of different severity. Anastomotic failure is a dreaded complication in colorectal  
10 surgery, which leads to organ space SSI and is assumed equally amenable to measures  
11 reducing SSI incidence. Ileus is a common postoperative problem after colorectal resection  
12 and might be triggered by alterations in the colorectal microbiome or mechanical irritations,  
13 which are assumed to take place in consequence of SSI prevention measures. Postoperative  
14 mortality and morbidity are highly relevant when evaluating colorectal resections. For their  
15 assessment, the Clavien-Dindo scheme, a validated and widely used classification of  
16 perioperative complications, will preferably be used<sup>26</sup>. Re-operation, hospital re-admission,  
17 and both overall and postoperative length of stay are all directly patient-relevant parameters  
18 of quality of care. Quality of life is an important outcome, as it is a direct reflection of a  
19 patient’s wellbeing.

### 26 **Quality Assessment and data extraction**

28 Two independent reviewers will assess study quality/risk of bias following Cochrane  
29 recommendations<sup>27</sup>. Five specific domains of bias will be investigated with the Cochrane risk  
30 of bias tool version 2. Based on this assessment, each reviewer assigns an overall level of risk  
31 of bias to each study with respect to the primary outcome. This overall risk of bias is defined  
32 as the least favourable assessment across five domains of bias, with each domain being  
33 assigned low risk of bias, some concerns, or high risk of bias. Bias level will be used as a quality  
34 measurement for each study in sensitivity and subgroup analyses. Published aggregate data  
35 will be extracted from full texts of publications. Two reviewers will extract data independently  
36 by using a standardized extraction form and will consult a third reviewer if arbitration is  
37 required to reach consensus. The form will compile the following items, if available, separately  
38 for each study arm:

- 43 • General information on the study: title, authors, contact address, funding sources, language,  
44 publication status, year of publication, place(s) and year(s) of study conduction
- 46 • Study design issues: in-/exclusion criteria, randomisation, risk of bias, length of study/follow-  
47 up period
- 49 • Baseline characteristics of participants: size of intervention and comparison group, and for  
50 each group the distribution of age, sex, World Health Organization [WHO] performance status  
51 or American Society of Anesthesiologists [ASA] classification, underlying disease; in case of  
52 malignant disease: histology, tumor location (right-sided colon, left-sided colon, rectum), TNM  
53 and UICC stage, neoadjuvant therapy; details of the performed resection (extent, surgical  
54 access [open/minimally-invasive], construction of anastomosis [yes/no], protective ostomy  
55 placement [yes/no])

- Characteristics of the intervention: details of intravenous antibiotic administration, MBP, OAP including the administered compound and its dosage
- Loss to follow-up
- Incidence and precision estimate of SSI of any severity
- Incidence and precision estimate of the three SSI severity grades according to the CDC classification<sup>2</sup>
- Incidence and precision estimates of anastomotic failure, ileus, and clostridium difficile infection
- Postoperative mortality
  - Postoperative morbidity (any in-hospital complication classified as Clavien-Dindo grade I-IV<sup>26</sup> or with a comparable classification)
- Incidence and precision estimates of re-operation and hospital re-admission
- Hospital length of stay (absolute number of days and precision estimate)
- Postoperative length of stay (absolute number of days and precision estimate)
- Quality of life, as measured within the single trials

The data extraction form will be pilot tested on two retrieved studies and, if needed, be revised.

### Multi-component network meta-analysis

As described in Figure 1, the network will presumably include nodes that consist of combinations of several treatment components (panel A), while the aim is to estimate treatment effects related to the basic components in addition to interaction effects. Assuming an additive relation between combinations of basic components, a random-effects multicomponent network meta-analysis as described by Welton et al.<sup>14</sup> and Rücker et al.<sup>28</sup>, using the frequentist implementation<sup>15</sup> incorporated in the R<sup>29</sup> extension netmeta<sup>30</sup> will be performed. By using this model, multi-arm trials can be incorporated and mixed effects for basic and combined components are estimated.

The effect size with respect to dichotomous and categorical outcomes (such as the primary outcome SSI incidence) will be measured with odds ratios (OR) with 95% confidence intervals (CI). We will extract ORs whenever they are reported in the identified trials preferably from adjusted models. Otherwise, e.g., in cases where different effect measures such as the risk ratio are reported, they will be calculated using extracted frequencies and sample sizes in the trial arms. For continuous outcomes (e.g., length of hospital stay), the standardized mean difference (SMD) with its 95% CI will be calculated. Ordinal endpoints (e.g. quality of life scores) will be treated either as dichotomous events or as continuous data, depending on the number of categories observed, as well as the numbers falling into each category. The network meta-analysis model will include random effects to account for possible variation between trials due to clinical or statistical heterogeneity. Basic components, as well as the combinations addressed in primary trials, will be estimated. However, edges in the network that are informed by direct evidence will be compared with results from pairwise meta-analysis using the

1  
2  
3 method of Bucher to assess potential inconsistency in the network. The treatment options will be  
4 ranked using the P-Score. Publication bias will be explored by evaluating funnel plot asymmetry if a  
5 sufficient number of studies is available.  
6

#### 7 Subgroup and sensitivity analyses

8  
9 With respect to the network meta-analyses and the primary outcome SSI incidence, subgroup analyses  
10 stratified for the study-level covariates type of resection (open vs. minimally-invasive, colon vs.  
11 rectum) and underlying disease (malignant vs. benign) as well as for different characteristics of the  
12 single interventions (high vs. low volume solutions for MBP, different classes of antibiotics for intra-  
13 venous and oral administration) will be conducted. Other subgroup analyses will be defined based on  
14 exploratory analyses of the available data. For all outcomes, sensitivity analyses based on the risk of  
15 bias assigned to studies as described above (low, some concerns, high) will be performed. All statistical  
16 analyses will be conducted with R version 4.1.1 or higher <sup>29</sup>and its extensions netmeta <sup>30</sup>, caret <sup>31</sup> and  
17 tidyverse <sup>32</sup> and potentially other required extensions.  
18  
19

20  
21 A 'summary of findings' table will be produced according to the methodology stipulated in the  
22 Cochrane Handbook for Systematic Reviews of Interventions <sup>33</sup> It will provide information on the  
23 quality of evidence using the GRADE system, on the effect magnitude of interventions, and on what  
24 data are available with regard to the primary and relevant secondary outcomes, for both basic and  
25 combined components.  
26  
27

## 28 29 **Ethics and dissemination**

30  
31  
32 Ethics approval has been obtained from the Ethical Committee, Medical Faculty, Martin-  
33 Luther-University Halle-Wittenberg. The study is registered with PROSPERO (ID:  
34 CRD42021267322)  
35  
36

### 37 38 **Strategies for data sharing and dissemination of results**

39  
40 Aggregate data from single trials will be combined in a dedicated database, will be stored in a  
41 repository and upon request made available for secondary analyses to other researchers.  
42 Results shall be disseminated directly to decision-makers such as surgeons,  
43 gastroenterologists, wound care specialists etc. by means of publication in peer-reviewed  
44 journals. The means of dissemination will be presentations at national and international  
45 conferences as well as specific events. In particular, a virtual or on-site symposium where the  
46 results of the analysis will be presented and discussed among decision-makers is planned.  
47 Results will be actively presented to the bodies in charge of national and international  
48 treatment guidelines. Because results are expected to have a direct and relevant impact on  
49 patients' decision-making, we will specifically communicate them to patients and the public.  
50 Possible media of dissemination are health-specific sections of newspapers, radio and TV  
51 programs as well as a direct approach through patients' organizations.  
52  
53

### 54 55 **Patient involvement**

56  
57  
58 While SSI is the defined primary outcome of this study, several secondary outcomes will be  
59 assessed as well. Patient involvement is crucial in order to define the relevance of outcomes  
60

1  
2  
3 to patients. A staged approach regarding patient involvement will be employed. During  
4 literature review, all pre-specified outcomes will be considered. After all data are extracted,  
5 available outcomes including how they were collected (e.g. specific quality of life indices) will  
6 be listed. This list will be a basis for a discussion with patient representatives recruited through  
7 the patient organisation Deutsche ILCO e.V. In particular, a focus group discussion with at least  
8 five patient representatives will be conducted. This discussion will serve to rank the subjective  
9 importance of available outcomes to patients. A ranking scale will be devised by the  
10 assignment of points to each outcome by the single participants. Regarding outcomes which  
11 can be measured in multiple ways, such as quality of life, the specific measurement available  
12 from the trials will also be discussed and judged by the patient representatives. After  
13 completion of the analyses, results will be discussed again in the framework of a focus group  
14 discussion with patient representatives from Deutsche ILCO e.V. Similar to the first discussion,  
15 the importance of the results of the single outcomes will be ranked by assigning points in the  
16 light of the specific result. Both rankings will be reported in all presentations of results. It is  
17 planned to present results not only to a scientific audience, but also to patients and their next  
18 of kin through appropriate media and in dedicated settings like information events.

### 25 **Authors' contribution**

26  
27 The study concept and design were conceived by UR, JH, MG, SS, JV, MP, MK, JK and CM. UR,  
28 JH and JF will conduct article screening and data extraction. SS, JV and MP will perform data  
29 analysis. All authors drafted this manuscript, revised it for content and have provided the final  
30 approval of this version. UR, the corresponding author, is the guarantor of the review.

### 33 **Funding statement**

34  
35 This work is supported by the Federal Ministry of Education and Research, grant number:  
36 01KG2106 and by intramural funding (Advanced Clinician Scientist program) of the Medical  
37 Faculty, Martin-Luther-University Halle-Wittenberg.

### 40 **Competing interests statement**

41  
42 None declared.

### 44 **References**

- 46 1 Statistisches Bundesamt (Destatis) - Zentraler Auskunftsdienst. Entgeltsysteme im  
47 Krankenhaus DRG-Statistik und PEPP-Statistik, 2020. [http://www.gbe-bund.de/oowa921-install/servlet/oowa/aw92/dboowasys921.xwdevkit/xwd\\_init?gbe.isgbetol/xs\\_start\\_neu/&p\\_aid=i&p\\_aid=73536844&nummer=662&p\\_sprache=D&p\\_indsp=38216866&p\\_aid=67675748#AKT](http://www.gbe-bund.de/oowa921-install/servlet/oowa/aw92/dboowasys921.xwdevkit/xwd_init?gbe.isgbetol/xs_start_neu/&p_aid=i&p_aid=73536844&nummer=662&p_sprache=D&p_indsp=38216866&p_aid=67675748#AKT) (accessed 14 May 2020).
- 54 2 CDC. National Healthcare Safety Network (NHSN) Patient Safety Component Manual,  
55 2020. [https://www.cdc.gov/nhsn/pdfs/pscmanual/pscmanual\\_current.pdf](https://www.cdc.gov/nhsn/pdfs/pscmanual/pscmanual_current.pdf).
- 58 3 Nelson RL, Gladman E, Barbateskovic M. Antimicrobial prophylaxis for colorectal  
59 surgery. *Cochrane Database Syst Rev* 2014: Cd001181.



- 1  
2  
3 4 Gastmeier P, Brandt C, Sohr D, Babikir R, Mlageni D, Daschner F, et al. Postoperative  
4 Wundinfektionen nach stationären und ambulanten Operationen Ergebnisse aus dem  
5 Krankenhaus-Infektions-Surveillance-System (KISS). *Bundesgesundheitsblatt,*  
6 *Gesundheitsforschung, Gesundheitsschutz* 2004;47: 339–44.  
7  
8
- 9 5 Lissovoy G de, Fraeman K, Hutchins V, Murphy D, Song D, Vaughn BB. Surgical site  
10 infection: incidence and impact on hospital utilization and treatment costs. *American*  
11 *journal of infection control* 2009;37: 387–97.  
12
- 13 6 Chomsky-Higgins K, Kahn JG. Interventions and Innovation to Prevent Surgical Site  
14 Infection in Colorectal Surgery: A Cost-Effectiveness Analysis. *The Journal of surgical*  
15 *research* 2019;235: 373–82.  
16
- 17 7 Dietrich ES, Felder S, Kaier K. Kosten nosokomialer Infektionen. In: Dettenkofer M,  
18 Frank U, Just H-M, Lemmen S, Scherrer M, eds. *Praktische Krankenhaushygiene und*  
19 *Umweltschutz*. Berlin, Heidelberg: Springer Berlin Heidelberg, 2018, p. 335–46.  
20
- 21 8 Rollins KE, Javanmard-Emamghissi H, Lobo DN. Impact of mechanical bowel  
22 preparation in elective colorectal surgery: A meta-analysis. *World J Gastroenterol*  
23 2018;24: 519–36.  
24
- 25 9 McSorley ST, Steele CW, McMahan AJ. Meta-analysis of oral antibiotics, in combination  
26 with preoperative intravenous antibiotics and mechanical bowel preparation the day  
27 before surgery, compared with intravenous antibiotics and mechanical bowel  
28 preparation alone to reduce surgical-site infections in elective colorectal surgery. *BJS*  
29 *Open* 2018;2: 185–94.  
30
- 31 10 WHO. Global Guidelines for the Prevention of Surgical Site Infection 2016.  
32
- 33 11 Koullouros M, Khan N, Aly EH. The role of oral antibiotics prophylaxis in prevention of  
34 surgical site infection in colorectal surgery. *Int J Colorectal Dis* 2017;32: 1–18.  
35
- 36 12 Rollins KE, Javanmard-Emamghissi H, Acheson AG, Lobo DN. The Role of Oral Antibiotic  
37 Preparation in Elective Colorectal Surgery: A Meta-analysis. *Ann Surg* 2019;270: 43–58.  
38
- 39 13 Toh, J. W. T., Phan K, Hitos K, Pathma-Nathan N, El-Khoury T, Richardson AJ, et al.  
40 Association of Mechanical Bowel Preparation and Oral Antibiotics Before Elective  
41 Colorectal Surgery With Surgical Site Infection: A Network Meta-analysis. *JAMA Netw*  
42 *Open* 2018;1: e183226.  
43
- 44 14 Welton NJ, Caldwell DM, Adamopoulos E, Vedhara K. Mixed treatment comparison  
45 meta-analysis of complex interventions: psychological interventions in coronary heart  
46 disease. *American journal of epidemiology* 2009;169: 1158–65.  
47
- 48 15 Rücker G. Network meta-analysis, electrical networks and graph theory. *Research*  
49 *synthesis methods* 2012;3: 312–24.  
50
- 51 16 Tsafnat G, Glasziou P, Karystianis G, Coiera E. Automated screening of research studies  
52 for systematic reviews using study characteristics. *Systematic reviews* 2018;7: 64.  
53  
54  
55  
56  
57  
58  
59  
60



- 17 Thomas J, McNaught J, Ananiadou S. Applications of text mining within systematic reviews. *Research synthesis methods* 2011;2: 1–14.
- 18 O'Mara-Eves A, Thomas J, McNaught J, Miwa M, Ananiadou S. Using text mining for study identification in systematic reviews: a systematic review of current approaches. *Systematic reviews* 2015;4: 5.
- 19 Bannach-Brown A, Przybyła P, Thomas J, Rice ASC, Ananiadou S, Liao J, et al. Machine learning algorithms for systematic review: reducing workload in a preclinical review of animal studies and reducing human screening error. *Systematic reviews* 2019;8: 23.
- 20 Friedman J, Hastie T, Tibshirani R. Regularization Paths for Generalized Linear Models via Coordinate Descent. *Journal of statistical software* 2010;33: 1–22.
- 21 Steinwart I, Christmann A. *Support vector machines*. 1 ed. New York: Springer, 2008.
- 22 Breiman L. *Machine Learning* 2001;45: 5–32.
- 23 Davis J, Goadrich M. The relationship between Precision-Recall and ROC curves. In: Cohen W, ed. *Proceedings of the 23rd international conference on Machine learning*. New York, NY: ACM, 2006, p. 233–40.
- 24 Altena AJ, Spijker R, Leeflang MMG, Olabarriaga SD. Training sample selection: Impact on screening automation in diagnostic test accuracy reviews. *Research synthesis methods* 2021.
- 25 Hutton B, Salanti G, Caldwell DM, Chaimani A, Schmid CH, Cameron C, et al. The PRISMA extension statement for reporting of systematic reviews incorporating network meta-analyses of health care interventions: checklist and explanations. *Annals of internal medicine* 2015;162: 777–84.
- 26 Dindo D, Demartines N, Clavien P-A. Classification of surgical complications: a new proposal with evaluation in a cohort of 6336 patients and results of a survey. *Ann Surg* 2004;240: 205–13.
- 27 Sterne JAC, Savović J, Page MJ, Elbers RG, Blencowe NS, Boutron I, et al. RoB 2: a revised tool for assessing risk of bias in randomised trials. *BMJ (Clinical research ed.)* 2019;366: l4898.
- 28 Rucker G, Petropoulou M, Schwarzer G. Network meta-analysis of multicomponent interventions. *Biometrical journal. Biometrische Zeitschrift* 2020;62: 808–21.
- 29 R Core Team. *R: A language and environment for statistical computing*. Vienna, Austria: R Foundation for Statistical Computing, 2018. <https://www.r-project.org/>.
- 30 Rucker G, Krahn U, König J, Efthimiou O, Schwarzer G. netmeta: Network Meta-Analysis using Frequentist Methods 2020.
- 31 Kuhn M. *Classification and Regression Training [R package caret version 6.0-88]* 2021.
- 32 Wickham H, Averick M, Bryan J, Chang W, McGowan LD'A, François R, et al. Welcome to the Tidyverse. *Journal of Open Source Software* 2019;4: 1686.

- 1  
2  
3 33 Higgins JPT, Thomas J, Chandler J, Cumpston M, Li T, Page MJ, Welch VA, ed. *Cochrane*  
4 *Handbook for Systematic Reviews of Interventions*. 2 ed. Chichester (UK): John Wiley &  
5 Sons, 2019.  
6  
7  
8  
9  
10  
11  
12  
13  
14  
15  
16  
17  
18  
19  
20  
21  
22  
23  
24  
25  
26  
27  
28  
29  
30  
31  
32  
33  
34  
35  
36  
37  
38  
39  
40  
41  
42  
43  
44  
45  
46  
47  
48  
49  
50  
51  
52  
53  
54  
55  
56  
57  
58  
59  
60

For peer review only

BEAUFTRAGT VOM

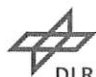

DLR Projektträger

Deutsches Zentrum für Luft- und Raumfahrt e.V.

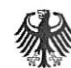Bundesministerium  
für Bildung  
und ForschungDLR Projektträger  
Heinrich-Konen-Straße 1, 53227 Bonn

Herr Dr. Ulrich Ronellenfitsch  
Martin-Luther-Universität Halle-Wittenberg  
Universitätsklinik und Poliklinik für Viszerale, Gefäß-  
und Endokrine Chirurgie  
Ernst-Grube-Str. 40  
06120 Halle (Saale)

DLR Projektträger  
Bereich Gesundheit

Ihre Ansprechpartner

Wissenschaftliche/r Mitarbeiter/in

Telefon

E-Mail

Administrative/r Mitarbeiter/in

Telefon

E-Mail

Telefax

Dr. Elise Radtke  
0228/3821-2435  
Elise.Radtke@dlr.de  
Dörte Lang  
0228/3821-1250  
Doerte.Lang@dlr.de

0228/3821-1257

02. Februar 2021

## **Bekanntmachung des Bundesministeriums für Bildung und Forschung „Klinische Studien mit hoher Relevanz für die Patientenversorgung“ im Rahmenprogramm Gesundheitsforschung der Bundesregierung vom 24. Februar 2020**

**Ihre Projektskizze (KS2020-172) mit dem Thema „INTerventions to Reduce the Incidence of Surgical Site Infection in colorectal resections: systematic review with multicomponent network meta-analysis“ vom 25. Mai 2020  
Unsere Eingangsbestätigung vom 05. Juni 2020**

Sehr geehrter Herr Dr. Ronellenfitsch,

vielen Dank für Ihre Beteiligung an der oben genannten Bekanntmachung des BMBF. Ihre oben genannte Projektskizze haben wir unter Einbeziehung eines interdisziplinär und international besetzten Begutachtungsgremiums eingehend geprüft.

Wir freuen uns Ihnen mitteilen zu können, dass Ihre Projektskizze **zur Förderung empfohlen** wird. In der Anlage finden Sie die detaillierte Bewertung Ihrer Skizze. Die Bewertung enthält weitere Empfehlungen und Hinweise.

Bitte reichen Sie nun den Formantrag ein. Bitte legen Sie mit dem Formantrag eine Stellungnahme zur Umsetzung der folgenden Auflagen und Empfehlungen vor:

- Es sollte klarer beschrieben werden, inwiefern die ggf. gegenseitig aufhebende Wirkung gleichzeitig durchgeführter Interventionen in der Netzwerk-Metaanalyse mit additiven Komponenten abgebildet werden kann.
- Bitte erläutern Sie, warum die intravenöse Antibiose in die Untersuchung einbezogen wird, obwohl sie seit 20 Jahren des Standardprozedere ist. Sind Ihnen eventuell Studien bekannt, die nahelegen, dass man diese Standardmedikation ersetzen kann?
- Es wird empfohlen, der ILCO e. V. anzubieten, die Ergebnisse des Reviews in laienverständlicher Sprache in ihrer Verbandszeitschrift „ILCO-PRAXIS“ vorzustellen.

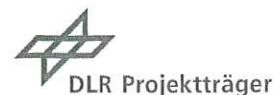

Ihrem Formantrag legen Sie bitte das in Ihrer Projektskizze dargestellte Finanzgerüst zugrunde. Das Finanzgerüst steht unter dem Vorbehalt der weiteren Prüfung der Zuwendungsfähigkeit.

Bitte verwenden Sie für die Erstellung des Formantrags das elektronische Online-Antragssystem **easy-Online** (<https://foerderportal.bund.de/easyonline>). Den direkten Link zu Ihrer Fördermaßnahme werden wir Ihnen gesondert per E-Mail übermitteln. Im „Formularschrank“ des BMBF, der ebenfalls über das Förderportal des Bundes zu erreichen ist, finden Sie die **Richtlinien für Zuwendungsanträge auf Ausgabenbasis**. Die Richtlinien sind bei der Erstellung des Formantrags und der Vorhabenbeschreibung unbedingt zu beachten. Insbesondere ist die in den Richtlinien vorgegebene **Gliederung der Vorhabenbeschreibung** zu übernehmen.

Die Papierform des formgerechten Antrags muss rechtsverbindlich unterschrieben werden.

Wir bitten Sie, den Antrag einschließlich der weiteren erforderlichen Unterlagen an die folgende Postadresse zu senden:

DLR Projektträger  
- Gesundheit -  
Dr. Elise Radtke  
Heinrich-Konen-Straße 1  
53227 Bonn

Wenn Ihr Formantrag bis zum **28.02.2021** vollständig vorliegt, kann die Laufzeit Ihres Vorhabens voraussichtlich zum **01.07.2021** beginnen. Sollten Sie den vorgeschlagenen Einreichungstermin nicht einhalten oder sollten uns die Antragsunterlagen bis zu diesem Zeitpunkt nicht vollständig vorliegen, werden wir den Förderbeginn verschieben. Eine rückwirkende Bewilligung ist aus zuwendungsrechtlichen Gründen nicht möglich.

Wir weisen Sie darauf hin, dass alle obigen Angaben eine Zwischenmitteilung zum derzeitigen Stand unserer Prüfung Ihrer Projektskizze darstellen. Die abschließende Prüfung wird erst nach der Vorlage des vollständigen Formantrags möglich sein.

Sie können aus diesem Schreiben **keinesfalls** einen Rechtsanspruch auf Förderung ableiten. Insbesondere können Sie bei Ablehnung Ihres Formantrags keinen Ersatz für angefallene Ausgaben bzw. Kosten erhalten.

Sollten Sie Fragen haben, rufen Sie uns gerne an.

Wir wünschen Ihnen viel Erfolg und freuen uns auf eine gute Zusammenarbeit.

Mit freundlichen Grüßen

i. A.

  
i. A. Dr. Svenja Krebs

i. A.

  
Dörte Lang

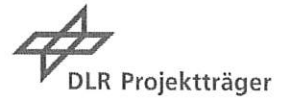

1  
2  
3  
4  
5  
6 Anlagen

- 7 - Detaillierte Bewertung der Projektskizze  
8 - Empfohlenes Finanzgerüst für die Formantragstellung  
9 - Hinweise und Checkliste zu Formantragstellung  
10 - Muster Verwertungsplan „Systematische Reviews“  
11  
12  
13  
14  
15  
16  
17  
18  
19  
20  
21  
22  
23  
24  
25  
26  
27  
28  
29  
30  
31  
32  
33  
34  
35  
36  
37  
38  
39  
40  
41  
42  
43  
44  
45  
46  
47  
48  
49  
50  
51  
52  
53  
54  
55  
56  
57  
58  
59  
60

1  
2  
3  
4  
5  
6  
7  
8  
9  
10  
11  
12  
13  
14  
15  
16  
17  
18  
19  
20  
21  
22  
23  
24  
25  
26  
27  
28  
29  
30  
31  
32  
33  
34  
35  
36  
37  
38  
39  
40  
41  
42  
43  
44  
45  
46  
47  
48  
49  
50  
51  
52  
53  
54  
55  
56  
57  
58  
59  
60

**PRISMA-P (Preferred Reporting Items for Systematic review and Meta-Analysis Protocols) 2015 checklist: recommended items to address in a systematic review protocol\***

| Section and topic                 | Item No | Checklist item                                                                                                                                                                                                                | Page |
|-----------------------------------|---------|-------------------------------------------------------------------------------------------------------------------------------------------------------------------------------------------------------------------------------|------|
| <b>ADMINISTRATIVE INFORMATION</b> |         |                                                                                                                                                                                                                               |      |
| Title:                            |         |                                                                                                                                                                                                                               |      |
| Identification                    | 1a      | Identify the report as a protocol of a systematic review                                                                                                                                                                      | 2    |
| Update                            | 1b      | If the protocol is for an update of a previous systematic review, identify as such                                                                                                                                            | N/A  |
| Registration                      | 2       | If registered, provide the name of the registry (such as PROSPERO) and registration number                                                                                                                                    | 2    |
| Authors:                          |         |                                                                                                                                                                                                                               |      |
| Contact                           | 3a      | Provide name, institutional affiliation, e-mail address of all protocol authors; provide physical mailing address of corresponding author                                                                                     | 1    |
| Contributions                     | 3b      | Describe contributions of protocol authors and identify the guarantor of the review                                                                                                                                           |      |
| Amendments                        | 4       | If the protocol represents an amendment of a previously completed or published protocol, identify as such and list changes; otherwise, state plan for documenting important protocol amendments                               | N/A  |
| Support:                          |         |                                                                                                                                                                                                                               |      |
| Sources                           | 5a      | Indicate sources of financial or other support for the review                                                                                                                                                                 | 11   |
| Sponsor                           | 5b      | Provide name for the review funder and/or sponsor                                                                                                                                                                             | 11   |
| Role of sponsor or funder         | 5c      | Describe roles of funder(s), sponsor(s), and/or institution(s), if any, in developing the protocol                                                                                                                            | N/A  |
| <b>INTRODUCTION</b>               |         |                                                                                                                                                                                                                               |      |
| Rationale                         | 6       | Describe the rationale for the review in the context of what is already known                                                                                                                                                 | 3-4  |
| Objectives                        | 7       | Provide an explicit statement of the question(s) the review will address with reference to participants, interventions, comparators, and outcomes (PICO)                                                                      | 5-7  |
| <b>METHODS</b>                    |         |                                                                                                                                                                                                                               |      |
| Eligibility criteria              | 8       | Specify the study characteristics (such as PICO, study design, setting, time frame) and report characteristics (such as years considered, language, publication status) to be used as criteria for eligibility for the review | 5-7  |
| Information sources               | 9       | Describe all intended information sources (such as electronic databases, contact with study authors, trial registers or other grey literature sources) with planned dates of coverage                                         | 4    |
| Search strategy                   | 10      | Present draft of search strategy to be used for at least one electronic database, including planned limits, such that it could be repeated                                                                                    | -    |



|                                    |     |                                                                                                                                                                                                                                                  |     |
|------------------------------------|-----|--------------------------------------------------------------------------------------------------------------------------------------------------------------------------------------------------------------------------------------------------|-----|
| Study records:                     |     |                                                                                                                                                                                                                                                  |     |
| Data management                    | 11a | Describe the mechanism(s) that will be used to manage records and data throughout the review                                                                                                                                                     |     |
| Selection process                  | 11b | State the process that will be used for selecting studies (such as two independent reviewers) through each phase of the review (that is, screening, eligibility and inclusion in meta-analysis)                                                  | 5   |
| Data collection process            | 11c | Describe planned method of extracting data from reports (such as piloting forms, done independently, in duplicate), any processes for obtaining and confirming data from investigators                                                           | 8   |
| Data items                         | 12  | List and define all variables for which data will be sought (such as PICO items, funding sources), any pre-planned data assumptions and simplifications                                                                                          | 8   |
| Outcomes and prioritization        | 13  | List and define all outcomes for which data will be sought, including prioritization of main and additional outcomes, with rationale                                                                                                             | 7   |
| Risk of bias in individual studies | 14  | Describe anticipated methods for assessing risk of bias of individual studies, including whether this will be done at the outcome or study level, or both; state how this information will be used in data synthesis                             | 7-8 |
| Data synthesis                     | 15a | Describe criteria under which study data will be quantitatively synthesised                                                                                                                                                                      | 9   |
|                                    | 15b | If data are appropriate for quantitative synthesis, describe planned summary measures, methods of handling data and methods of combining data from studies, including any planned exploration of consistency (such as $I^2$ , Kendall's $\tau$ ) | 9   |
|                                    | 15c | Describe any proposed additional analyses (such as sensitivity or subgroup analyses, meta-regression)                                                                                                                                            | 9   |
|                                    | 15d | If quantitative synthesis is not appropriate, describe the type of summary planned                                                                                                                                                               | 9   |
| Meta-bias(es)                      | 16  | Specify any planned assessment of meta-bias(es) (such as publication bias across studies, selective reporting within studies)                                                                                                                    | 7-8 |
| Confidence in cumulative evidence  | 17  | Describe how the strength of the body of evidence will be assessed (such as GRADE)                                                                                                                                                               | 9   |

**\* It is strongly recommended that this checklist be read in conjunction with the PRISMA-P Explanation and Elaboration (cite when available) for important clarification on the items. Amendments to a review protocol should be tracked and dated. The copyright for PRISMA-P (including checklist) is held by the PRISMA-P Group and is distributed under a Creative Commons Attribution Licence 4.0.**

*From: Shamseer L, Moher D, Clarke M, Ghersi D, Liberati A, Petticrew M, Shekelle P, Stewart L, PRISMA-P Group. Preferred reporting items for systematic review and meta-analysis protocols (PRISMA-P) 2015: elaboration and explanation. BMJ. 2015 Jan 2;349(jan02 1):g7647.*

# BMJ Open

## INterventions to Reduce the Incidence of Surgical Site Infection in colorectal resections: systematic review with multicomponent network meta-analysis (INTRISSI) – study protocol

|                                 |                                                                                                                                                                                                                                                                                                                                                                                                                                                                                                                                                                                                                                                                                                                                                                                                                                                                                                                                                                                                                                                                                   |
|---------------------------------|-----------------------------------------------------------------------------------------------------------------------------------------------------------------------------------------------------------------------------------------------------------------------------------------------------------------------------------------------------------------------------------------------------------------------------------------------------------------------------------------------------------------------------------------------------------------------------------------------------------------------------------------------------------------------------------------------------------------------------------------------------------------------------------------------------------------------------------------------------------------------------------------------------------------------------------------------------------------------------------------------------------------------------------------------------------------------------------|
| Journal:                        | <i>BMJ Open</i>                                                                                                                                                                                                                                                                                                                                                                                                                                                                                                                                                                                                                                                                                                                                                                                                                                                                                                                                                                                                                                                                   |
| Manuscript ID                   | bmjopen-2021-057226.R1                                                                                                                                                                                                                                                                                                                                                                                                                                                                                                                                                                                                                                                                                                                                                                                                                                                                                                                                                                                                                                                            |
| Article Type:                   | Protocol                                                                                                                                                                                                                                                                                                                                                                                                                                                                                                                                                                                                                                                                                                                                                                                                                                                                                                                                                                                                                                                                          |
| Date Submitted by the Author:   | 26-Oct-2021                                                                                                                                                                                                                                                                                                                                                                                                                                                                                                                                                                                                                                                                                                                                                                                                                                                                                                                                                                                                                                                                       |
| Complete List of Authors:       | Friedrichs, Juliane; Martin Luther University of Halle Wittenberg Faculty of Medicine, Department of Visceral, Vascular and Endocrine Surgery Seide, Svenja; Ruprecht Karls Universitat Heidelberg, Institute of Medical Biometry<br>Vey, Johannes; University Hospital Heidelberg, Germany, Institute of Medical Biometry<br>Zimmermann, Samuel; University Hospital Heidelberg, Institute of Medical Biometry<br>Hardt, Julia; University Medical Centre Mannheim Department of Surgery<br>Kleeff, Joerg; Martin-Luther University Halle-Wittenberg<br>Klose, Johannes; University Hospital Halle (Saale), Department of Visceral, Vascular and Endocrine Surgery<br>Michalski, Christoph; Universitätsklinikum Halle, Department of Visceral, Vascular and Endocrine Surgery<br>Kieser, Meinhard; University Hospital Heidelberg, Institute of Medical Biometry<br>Pilz, Maximilian; University Hospital Heidelberg, Institute of Medical Biometry<br>Ronellenfitch, Ulrich; Martin Luther University Halle Wittenberg, Department of Visceral, Vascular and Endocrine Surgery |
| <b>Primary Subject Heading</b>: | Surgery                                                                                                                                                                                                                                                                                                                                                                                                                                                                                                                                                                                                                                                                                                                                                                                                                                                                                                                                                                                                                                                                           |
| Secondary Subject Heading:      | Surgery                                                                                                                                                                                                                                                                                                                                                                                                                                                                                                                                                                                                                                                                                                                                                                                                                                                                                                                                                                                                                                                                           |
| Keywords:                       | Colorectal surgery < SURGERY, STATISTICS & RESEARCH METHODS, Adverse events < THERAPEUTICS                                                                                                                                                                                                                                                                                                                                                                                                                                                                                                                                                                                                                                                                                                                                                                                                                                                                                                                                                                                        |
|                                 |                                                                                                                                                                                                                                                                                                                                                                                                                                                                                                                                                                                                                                                                                                                                                                                                                                                                                                                                                                                                                                                                                   |

SCHOLARONE™  
Manuscripts



I, the Submitting Author has the right to grant and does grant on behalf of all authors of the Work (as defined in the below author licence), an exclusive licence and/or a non-exclusive licence for contributions from authors who are: i) UK Crown employees; ii) where BMJ has agreed a CC-BY licence shall apply, and/or iii) in accordance with the terms applicable for US Federal Government officers or employees acting as part of their official duties; on a worldwide, perpetual, irrevocable, royalty-free basis to BMJ Publishing Group Ltd ("BMJ") its licensees and where the relevant Journal is co-owned by BMJ to the co-owners of the Journal, to publish the Work in this journal and any other BMJ products and to exploit all rights, as set out in our [licence](#).

The Submitting Author accepts and understands that any supply made under these terms is made by BMJ to the Submitting Author unless you are acting as an employee on behalf of your employer or a postgraduate student of an affiliated institution which is paying any applicable article publishing charge ("APC") for Open Access articles. Where the Submitting Author wishes to make the Work available on an Open Access basis (and intends to pay the relevant APC), the terms of reuse of such Open Access shall be governed by a Creative Commons licence – details of these licences and which [Creative Commons](#) licence will apply to this Work are set out in our licence referred to above.

Other than as permitted in any relevant BMJ Author's Self Archiving Policies, I confirm this Work has not been accepted for publication elsewhere, is not being considered for publication elsewhere and does not duplicate material already published. I confirm all authors consent to publication of this Work and authorise the granting of this licence.

**INterventions to Reduce the Incidence of Surgical Site Infection in colorectal resections: systematic review with multicomponent network meta-analysis (INTRISSI) – study protocol**

| <b><u>Author</u></b>  | <b><u>Affiliation</u></b>                                                                          | <b><u>Email</u></b>                                                                      |
|-----------------------|----------------------------------------------------------------------------------------------------|------------------------------------------------------------------------------------------|
| Juliane Friedrichs    | University Hospital Halle (Saale), Germany, Department of Visceral, Vascular and Endocrine Surgery | juliane.friedrichs@uk-halle.de                                                           |
| Svenja E. Seide       | University Hospital Heidelberg, Germany, Institute of Medical Biometry, Heidelberg, Germany        | seide@imbi.uni-heidelberg.de                                                             |
| Johannes A. Vey       | University Hospital Heidelberg, Germany, Institute of Medical Biometry, Heidelberg, Germany        | vey@imbi.uni-heidelberg.de                                                               |
| Samuel Zimmermann     | University Hospital Heidelberg, Germany, Institute of Medical Biometry, Heidelberg, Germany        | zimmermann@imbi.uni-heidelberg.de                                                        |
| Julia Hardt           | University Medical Center Mannheim, Dpt. of Surgery                                                | Julia.hardt@umm.de                                                                       |
| Joeörg Kleeff         | University Hospital Halle (Saale), Germany, Department of Visceral, Vascular and Endocrine Surgery | joerg.kleeff@uk-halle.de                                                                 |
| Johannes Klose        | University Hospital Halle (Saale), Germany, Department of Visceral, Vascular and Endocrine Surgery | Johannes.Klose@uk-halle.de                                                               |
| Christoph Michalski   | University Hospital Halle (Saale), Germany, Department of Visceral, Vascular and Endocrine Surgery | Christoph.Michalski@uniklinik-ulm.de                                                     |
| Meinhard Kieser       | University Hospital Heidelberg, Germany, Institute of Medical Biometry, Heidelberg, Germany        | kieser@imbi.uni-heidelberg.de                                                            |
| Maximilian Pilz       | University Hospital Heidelberg, Germany, Institute of Medical Biometry, Heidelberg, Germany        | pilz@imbi.uni-heidelberg.de                                                              |
| Ulrich Ronellenfitsch | University Hospital Halle (Saale), Germany, Department of Visceral, Vascular and Endocrine Surgery | <a href="mailto:ulrich.Ronellenfitsch@uk-halle.de">ulrich.Ronellenfitsch@uk-halle.de</a> |

**Corresponding author:**

**Ulrich Ronellenfitsch, University Hospital Halle (Saale), Department of Visceral, Vascular and Endocrine Surgery, Ernst-Grube-Straße 40, 06120 Halle (Saale), Germany, [ulrich.ronellenfitsch@uk-halle.de](mailto:ulrich.ronellenfitsch@uk-halle.de)**

1  
2  
3 **Interventions to Reduce the Incidence of Surgical Site Infection in colorectal**  
4 **resections: systematic review with multicomponent network meta-analysis**  
5 **(INTRISSI) – study protocol**  
6  
7  
8  
9

10 Juliane Friedrichs, Johannes A. Vey, Svenja E. Seide, Maximilian Pilz, Samuel Zimmermann,  
11 Julia Hardt, Jörg Kleeff, Johannes Klose, Christoph Michalski, Meinhard Kieser, Ulrich  
12 Ronellenfitsch  
13

14  
15 **Abstract**  
16

17 **Objective** To assess the relative contribution of intravenous antibiotic prophylaxis, mechanical  
18 bowel preparation, oral antibiotic prophylaxis, and combinations thereof towards the  
19 reduction of surgical site infection (SSI) incidence in elective colorectal resections.  
20  
21

22 **Methods and Analysis** Multicomponent network meta-analysis using machine learning based  
23 screening. A systematic search of randomised controlled trials (RCTs) comparing interventions  
24 to reduce SSI incidence will be conducted with predefined search terms in the following  
25 databases: MEDLINE, LILACS, Cochrane Central Register of Controlled Trials (CENTRAL), and  
26 the Cochrane Database of Systematic Reviews (CDSR). Additionally, several online databases  
27 will be searched for ongoing trials, and conference proceedings and reference lists of retrieved  
28 articles will be hand-searched. The title-abstract screening will be partly performed by means  
29 of a semi-automated supervised machine learning approach, which will be trained on a subset  
30 of the identified titles and abstracts identified through traditional screening methods.  
31  
32

33  
34 The primary analysis will be a multicomponent network meta-analysis, as we expect to identify  
35 studies that investigate combinations of interventions (e.g. mechanical bowel preparation  
36 combined with oral antibiotics), as well as studies that focus on individual components  
37 (mechanical bowel preparation or oral antibiotics). By means of a multicomponent network  
38 meta-analysis we aim at estimating the effects of the separate components along the effects  
39 of the observed combinations. To account for between-trial heterogeneity, a random-effects  
40 approach will be combined with inverse variance weighting for estimation of the treatment  
41 effects. Associated 95% CIs will be calculated as well as the ranking for each component in the  
42 network using P-Scores. Visualisation will be done by network graphics and forest plots of the  
43 overall pairwise effect estimates. Comparison adjusted funnel-plots will be used to assess  
44 publication bias.  
45  
46  
47  
48

49 **Ethics and Dissemination** Ethical approval by the Ethical Committee of the Medical Faculty of  
50 the Martin-Luther-University Halle-Wittenberg (ID of approval: 2021-148). Results shall be  
51 disseminated directly to decision-makers (e.g. surgeons, gastroenterologists, wound care  
52 specialists) by means of publication in peer-reviewed journals, presentation at conferences  
53 and through the media (e.g. radio, TV, etc.).  
54  
55  
56  
57  
58

59 **Trial registration number** registered at Prospero (ID: CRD42021267322)  
60

**Strength and limitations of this study:**

- Literature screening is supported by machine learning, which is a new and highly innovative technique saving work and time.
- The multicomponent network meta-analysis integrates and compares all available evidence on how effective the different interventions are in preventing SSIs.
- Results will be rated and discussed with patient representatives
- No individual patient data will be available from trials.

**Introduction**

Colorectal resections are some of the most frequently performed operations in abdominal surgery. For 2018, in Germany, the annual number of colorectal resections for all causes reached 350,803<sup>1</sup>. Due to the microbiome inherent to the colon and rectum, postoperative surgical site infections (SSIs) are a frequent problem. According to the commonly used definition of the Centres for Disease Control (CDC), they comprise infections of the incision, fascia and muscle layer, or the organ space<sup>2</sup>. It is estimated that SSIs occur in up to 40% of colorectal resections<sup>3</sup>, amounting to approximately 130,000 annual cases of SSI in Germany alone<sup>4</sup>.

SSIs have a relevant impact on both patients and health care systems. Depending on severity, they require additional interventions, prolong the hospital stay, increase treatment and societal costs, negatively impact quality of life, lead to temporary or permanent disability, or can even be life threatening. The median prolongation of hospital stays due to SSIs after colorectal surgery is estimated to be seven days<sup>5</sup>, and the quality adjusted life years (QALYs) lost for patients suffering an SSI 0.93<sup>6</sup>. The cost of an SSI is estimated at around 30,000 USD in the USA<sup>6</sup> and between 926 and 65,114 Euro in Germany<sup>7</sup>.

Several interventions have been used with the aim of reducing the SSI risk in elective colorectal resections. However, the evidence is conflicting and to some aspects contradictory. Intravenous antibiotics prior to skin incision are considered indispensable based on high-level evidence from studies comparing it to no intravenous antibiotic administration<sup>3</sup>. Mechanical bowel preparation (MBP) using a drinkable cleansing solution has been assessed in a recent meta-analysis comprising both RCTs and observational studies. It failed to show a lower SSI incidence in patients receiving MBP<sup>8</sup>. There is evidence that oral antibiotic prophylaxis (OAP) in combination with MBP prior to resection reduces SSI incidence to a larger extent than MBP alone<sup>9</sup>. This has led to the recommendation of the combination in the WHO guidelines for SSI prevention<sup>10</sup>. Yet, when compared to intravenous antibiotic prophylaxis, OAP is associated with higher SSI incidence<sup>11</sup>. A recent meta-analysis aimed at assessing the impact of OAP with or without MBP compared with different other prophylactic strategies on the incidence of SSI and other postoperative complications<sup>12</sup>. The authors concluded that OAP is associated with lower SSI incidence. However, the interpretation of the results is limited because no network meta-analysis was done. This methodology was applied by Toh et al. for a comparison of

1  
2  
3 different prophylactic interventions<sup>13</sup>. The analysis found that MBP with OAP was associated  
4 with the lowest SSI risk compared to OAB alone, MBP alone or no preparation. However, the  
5 effect of intravenous antibiotics was not assessed and the methods used did not allow  
6 calculating the relative contribution of the single interventions to the observed effects.  
7  
8

9 In summary, there is substantial evidence comparing different interventions and combinations  
10 thereof for SSI prevention in elective colorectal surgery. Yet, no comprehensive analysis of this  
11 evidence using appropriate methods for discerning the true effects of the single interventions  
12 or combinations has been done so far. Traditional network meta-analysis approaches either  
13 lump such combinations into classes of treatments with high variation between studies  
14 contributing information, or treat all combinations as separate nodes by splitting the network.  
15 Recently, an approach developed for network meta-analysis of multi-component  
16 interventions<sup>14</sup> has been formalized<sup>15</sup>. This multi-component network meta-analysis (CNMA)  
17 estimates the separate components of which treatments consist, e.g., MBP, intravenous  
18 antibiotics, and OAP, along with treatment combinations actually used in identified RCTs.  
19 CNMA is therefore the only approach that allows estimating treatment effects of a given  
20 component relative to a reference component, of combinations of components compared to  
21 a reference component, and of all possible treatment contrasts based on the estimation  
22 results and the network structure. It is the only method which can validly answer the research  
23 question regarding SSI prevention in elective colorectal resection.  
24  
25  
26  
27  
28

29 Another important aspect targeted by this study is the burdensome and time-consuming title  
30 abstract screening in systematic reviews. Although machine learning has developed rapidly in  
31 recent years and has been proposed for usage in systematic reviews<sup>16-18</sup>, there is only a limited  
32 number of studies actually applying text-mining in combination with supervised learning in  
33 medical research<sup>17 19</sup>. The project evaluates the practicability of applying natural language  
34 processing procedures and machine learning techniques to abstract screening in the scope of  
35 a real-world example. We aim at providing a standardized workflow to support abstract  
36 screening with advanced machine learning techniques.  
37  
38  
39

## 40 **Methods and Analysis**

### 41 **Search strategies and information sources**

42  
43 A computer-based literature search will be performed in several databases, including the  
44 Cochrane Central Register of Controlled Trials (CENTRAL), Cochrane Database of Systematic  
45 Reviews (CDSR) from The Cochrane Library, MEDLINE (1966 to present), LILACS (Literatura  
46 Latinoamericana y del Caribe en Ciencias de la Salud), Current Contents / Clinical Medicine  
47 (1990 to present) and Web of Science (1945 to present). The search will be limited to studies  
48 in humans. No language restrictions will apply. The Cochrane Highly Sensitive Search Strategy  
49 for identifying randomised trials in MEDLINE, Sensitivity maximizing version, NCBI Platform,  
50 will be employed with predefined search terms (supplementary file). It will be adapted for the  
51 other databases searched. Moreover, the following online databases of ongoing trials will be  
52 searched: [www.clinicaltrials.nci.nih.gov](http://www.clinicaltrials.nci.nih.gov); [www.centerwatch.com](http://www.centerwatch.com); [www.trialscentral.org](http://www.trialscentral.org);  
53 [www.controlledtrials.com](http://www.controlledtrials.com); [www.eortc.be](http://www.eortc.be); [www.studien.de](http://www.studien.de); and [www.germanctr.de](http://www.germanctr.de).  
54 Reference lists of retrieved articles will be scanned for further eligible trials (backward search)  
55  
56  
57  
58  
59  
60



1  
2  
3 and citations of identified trials will be checked for inclusion (forward search). Experts in the  
4 field will be contacted about any unpublished or ongoing studies  
5

### 6 **Study selection**

7  
8 This CNMA is limited to RCTs, which are the only study design able to provide unbiased  
9 evidence for the research question. Due to the nature of the interventions and comparator  
10 under study, blinding of either the patient or the treating physician is not possible for all  
11 interventions and is therefore not considered an in- or exclusion criterion. There are no  
12 restrictions regarding minimal follow-up time or study size.  
13  
14

15  
16 Study selection will be partly performed using machine learning (ML) methods in a semi-  
17 automated screening procedure due to the large number of citations expected from our  
18 search strategy. First, the identified studies will be randomized into three data sets: training  
19 data set, validation data set, and screening data set, with equal sizes of 33.3%. In the training  
20 set, two independent reviewers will assess title, keywords, and abstracts of all retrieved  
21 studies and decide which studies are included into the systematic review. Any disagreements  
22 will be resolved by consensus or consultation with a third reviewer.  
23  
24

25  
26 For the purpose of computer-based text classification based on the abstracts, the texts will be  
27 pre-processed to achieve consistent format by means of various cleaning approaches, such as  
28 transformation to lower case and removing punctuation, symbols, numbers, and stop words.  
29 Text reduction will be performed by using stemming techniques and a document-term matrix  
30 will be created as input for the ML methods. Three ML methods will be applied independently  
31 to predict whether a particular study is included into the systematic review or not. Those  
32 methods are regularized logistic regression<sup>20</sup>, kernel-based support vector machines<sup>21</sup>, and  
33 tree-based random forests<sup>22</sup>. These three approaches stem from different sectors of ML and,  
34 therefore a wide range of methods is covered. If appropriate, the number of applied  
35 algorithms can be extended, e.g., if no sufficiently high performance can be achieved by at  
36 least one of these algorithms. After tuning the algorithms using repeated cross-validation, the  
37 ML techniques in the validation set will be assessed by using the AUC (area under the curve)  
38 as performance measure. To consider the imbalanced class distribution, the Precision-Recall  
39 (PR) curve<sup>23</sup> will be applied additional to the Receiver Operating Characteristics (ROC) curve  
40 to computing the AUC. The corresponding PR and ROC curve will be plotted and key numbers  
41 such as the AUC, sensitivity, specificity, accuracy, and the worked saved over sampling (WSS)<sup>24</sup>  
42 will be reported to evaluate the algorithms' quality. Per algorithm, the 10% of citations with  
43 the largest difference between human decision (0 or 1 for exclude or include) and the  
44 predicted (continuous) inclusion probability will be identified and the validity of human-based  
45 and algorithm-based decisions will be re-evaluated. This procedure will be repeated by adding  
46 a further 10% of unseen, randomly selected citations to the training set. If the performance of  
47 at least one ML algorithm is deemed acceptable, the citations in the screening set need to be  
48 screened by only one human and the second reviewer is replaced by the best-performing ML  
49 method. For all citations identified as eligible in title-abstract screening, full-text will be  
50 retrieved and scrutinized by two independent reviewers. Any disagreements will be resolved  
51 by consensus, or by consultation with a third reviewer. The entire process of study retrieval,  
52  
53  
54  
55  
56  
57  
58  
59  
60

1  
2  
3 in- and exclusion will be displayed in a flowchart as stipulated by the PRISMA-NMA statement  
4 25.  
5

### 6 **Population**

7  
8 To be included, trials need to be conducted on patients undergoing elective, i.e. non-  
9 emergent, planned, colorectal resection. Resection will be defined as removal of at least a  
10 segment of the colon or rectum, with or without primary anastomosis and with or without  
11 protective ostomy placement. There will be no limitations regarding the underlying disease  
12 constituting the indication for resection. Thus, both malignant diseases such as colon cancer,  
13 and benign diseases such as diverticulitis, will be included.  
14  
15

### 16 **Intervention(s)**

17  
18 (1) intravenous antibiotic prophylaxis,  
19  
20 (2) mechanical bowel preparation (MBP),  
21  
22 (3) oral antibiotic prophylaxis (OAP),  
23  
24 or any combination of (1), (2), and (3)  
25

### 26 **Comparator(s)**

27  
28 No intervention, defined as the absence of any of (1), (2), or (3).  
29

30  
31 To be included in this CNMA, trials must either compare any of the interventions or  
32 combinations thereof directly with another or with no intervention or combinations thereof;  
33 or one of the trial arms must be the comparator. A network like the one illustrated in Figure  
34 1A is expected to be identified in the systematic literature review. In that network, the  
35 treatment nodes are defined mostly by combinations of separate treatment components and  
36 the estimation results need to be interpreted as treatment interaction effects. Besides these  
37 interaction effects, the treatment effects for the separate components by means of CNMA will  
38 also be estimated, which is visualized in Figure 1B.  
39  
40  
41  
42  
43  
44  
45

46 Figure 1: A) Network of treatment expected to be identified through the systematic review

47  
48 B) Network of separate components that will be estimated through the CNMA  
49  
50  
51

### 52 **Outcomes**

53  
54 The primary outcome will be SSI of any severity.

55  
56 Secondary outcomes will be:

- 57  
58 • severity of SSI according to the CDC classification (superficial, deep incisional, organ space)<sup>2</sup>  
59  
60 • anastomotic failure

- ileus
- clostridium difficile infection
- postoperative mortality
- postoperative morbidity (any in-hospital complication classified as Clavien-Dindo grade I-IV<sup>26</sup> or with a comparable classification);
- re-operation
- hospital re-admission
- hospital length of stay
- postoperative length of stay
- quality of life (as measured in the single studies)

SSI is the pre-specified primary outcome because a direct effect of the tested interventions is assumed.

As detailed in section “Patient involvement”, patient representatives will rank subjective importance of the available secondary outcomes. These rankings will be used to identify highly patient-relevant outcomes on which we will place special emphasis in the interpretation and discussion of results. Regardless of this ranking, the different outcomes reflect different aspects of the clinical course and potential complications following colorectal resection. SSI is commonly classified into three severity grades<sup>2</sup>. The tested interventions might have different effects on SSI of different severity. Anastomotic failure is a dreaded complication in colorectal surgery, which leads to organ space SSI and is assumed equally amenable to measures reducing SSI incidence. Ileus is a common postoperative problem after colorectal resection and might be triggered by alterations in the colorectal microbiome or mechanical irritations, which are assumed to take place in consequence of SSI prevention measures. Postoperative mortality and morbidity are highly relevant when evaluating colorectal resections. For their assessment, the Clavien-Dindo scheme, a validated and widely used classification of perioperative complications, will preferably be used<sup>26</sup>. Re-operation, hospital re-admission, and both overall and postoperative length of stay are all directly patient-relevant parameters of quality of care. Quality of life is an important outcome, as it is a direct reflection of a patient’s wellbeing.

### **Quality Assessment and data extraction**

Two independent reviewers will assess study quality/risk of bias following Cochrane recommendations<sup>27</sup>. Five specific domains of bias will be investigated with the Cochrane risk of bias tool version 2. Based on this assessment, each reviewer assigns an overall level of risk of bias to each study with respect to the primary outcome. This overall risk of bias is defined as the least favourable assessment across five domains of bias, with each domain being assigned low risk of bias, some concerns, or high risk of bias. Bias level will be used as a quality measurement for each study in sensitivity and subgroup analyses. Published aggregate data will be extracted from full texts of publications. Two reviewers will extract data independently

1  
2  
3 by using a standardized extraction form and will consult a third reviewer if arbitration is  
4 required to reach consensus. The form will compile the following items, if available, separately  
5 for each study arm:  
6

- 7 • General information on the study: title, authors, contact address, funding sources, language,  
8 publication status, year of publication, place(s) and year(s) of study conduction  
9
- 10 • Study design issues: in-/exclusion criteria, randomisation, risk of bias, length of study/follow-  
11 up period  
12
- 13 • Baseline characteristics of participants: size of intervention and comparison group, and for  
14 each group the distribution of age, sex, World Health Organization [WHO] performance status  
15 or American Society of Anesthesiologists [ASA] classification, underlying disease; in case of  
16 malignant disease: histology, tumor location (right-sided colon, left-sided colon, rectum), TNM  
17 and UICC stage, neoadjuvant therapy; details of the performed resection (extent, surgical  
18 access [open/minimally-invasive], construction of anastomosis [yes/no], protective ostomy  
19 placement [yes/no])  
20
- 21 • Characteristics of the intervention: details of intravenous antibiotic administration, MBP,  
22 OAP including the administered compound and its dosage  
23
- 24 • Loss to follow-up  
25
- 26 • Incidence and precision estimate of SSI of any severity  
27
- 28 • Incidence and precision estimate of the three SSI severity grades according to the CDC  
29 classification<sup>2</sup>  
30
- 31 • Incidence and precision estimates of anastomotic failure, ileus, and clostridium difficile  
32 infection  
33
- 34 • Postoperative mortality  
35
- 36 • Postoperative morbidity (any in-hospital complication classified as Clavien-Dindo grade I-  
37 IV<sup>26</sup> or with a comparable classification)  
38
- 39 • Incidence and precision estimates of re-operation and hospital re-admission  
40
- 41 • Hospital length of stay (absolute number of days and precision estimate)  
42
- 43 • Postoperative length of stay (absolute number of days and precision estimate)  
44
- 45 • Quality of life, as measured within the single trials  
46

47  
48  
49  
50  
51  
52 The data extraction form will be pilot tested on two retrieved studies and, if needed, be  
53 revised.  
54

### 55 56 57 **Multi-component network meta-analysis**

58  
59 As described in Figure 1, the network will presumably include nodes that consist of combinations of  
60 several treatment components (panel A), while the aim is to estimate treatment effects related to the

1  
2  
3 basic components in addition to interaction effects. Assuming an additive relation between  
4 combinations of basic components, a random-effects multicomponent network meta-analysis as  
5 described by Welton et al.<sup>14</sup> and Rücker et al.<sup>28</sup>, using the frequentist implementation<sup>15</sup> incorporated  
6 in the R<sup>29</sup> extension netmeta<sup>30</sup> will be performed. By using this model, multi-arm trials can be  
7 incorporated and mixed effects for basic and combined components are estimated.  
8  
9

10 The effect size with respect to dichotomous and categorical outcomes (such as the primary outcome  
11 SSI incidence) will be measured with odds ratios (OR) with 95% confidence intervals (CI). We will extract  
12 ORs whenever they are reported in the identified trials preferably from adjusted models. Otherwise,  
13 e.g., in cases where different effect measures such as the risk ratio are reported, they will be calculated  
14 using extracted frequencies and sample sizes in the trial arms. For continuous outcomes (e.g., length  
15 of hospital stay), the standardized mean difference (SMD) with its 95% CI will be calculated. Ordinal  
16 endpoints (e.g. quality of life scores) will be treated either as dichotomous events or as continuous  
17 data, depending on the number of categories observed, as well as the numbers falling into each  
18 category. The network meta-analysis model will include random effects to account for possible  
19 variation between trials due to clinical or statistical heterogeneity. Basic components, as well as the  
20 combinations addressed in primary trials, will be estimated. However, edges in the network that are  
21 informed by direct evidence will be compared with results from pairwise meta-analysis using the  
22 method of Bucher to assess potential inconsistency in the network. The treatment options will be  
23 ranked using the P-Score. Publication bias will be explored by evaluating funnel plot asymmetry if a  
24 sufficient number of studies is available.  
25  
26  
27

### 28 Subgroup and sensitivity analyses

29  
30 With respect to the network meta-analyses and the primary outcome SSI incidence, subgroup analyses  
31 stratified for the study-level covariates type of resection (open vs. minimally-invasive, colon vs.  
32 rectum) and underlying disease (malignant vs. benign) as well as for different characteristics of the  
33 single interventions (high vs. low volume solutions for MBP, different classes of antibiotics for intra-  
34 venous and oral administration) will be conducted. Other subgroup analyses will be defined based on  
35 exploratory analyses of the available data. For all outcomes, sensitivity analyses based on the risk of  
36 bias assigned to studies as described above (low, some concerns, high) will be performed. All statistical  
37 analyses will be conducted with R version 4.1.1 or higher<sup>29</sup> and its extensions netmeta<sup>30</sup>, caret<sup>31</sup> and  
38 tidyverse<sup>32</sup> and potentially other required extensions.  
39  
40  
41

42 A 'summary of findings' table will be produced according to the methodology stipulated in the  
43 Cochrane Handbook for Systematic Reviews of Interventions<sup>33</sup> It will provide information on the  
44 quality of evidence using the GRADE system, on the effect magnitude of interventions, and on what  
45 data are available with regard to the primary and relevant secondary outcomes, for both basic and  
46 combined components.  
47  
48  
49  
50

## 51 Ethics and dissemination

52  
53 Ethics approval has been obtained from the Ethical Committee, Medical Faculty, Martin-  
54 Luther-University Halle-Wittenberg. The study is registered with PROSPERO (ID:  
55 CRD42021267322)  
56  
57  
58  
59

### 60 Strategies for data sharing and dissemination of results

1  
2  
3 Aggregate data from single trials will be combined in a dedicated database, will be stored in a  
4 repository and upon request made available for secondary analyses to other researchers.  
5 Results shall be disseminated directly to decision-makers such as surgeons,  
6 gastroenterologists, wound care specialists etc. by means of publication in peer-reviewed  
7 journals. The means of dissemination will be presentations at national and international  
8 conferences as well as specific events. In particular, a virtual or on-site symposium where the  
9 results of the analysis will be presented and discussed among decision-makers is planned.  
10 Results will be actively presented to the bodies in charge of national and international  
11 treatment guidelines. Because results are expected to have a direct and relevant impact on  
12 patients' decision-making, we will specifically communicate them to patients and the public.  
13 Possible media of dissemination are health-specific sections of newspapers, radio and TV  
14 programs as well as a direct approach through patients' organizations.  
15  
16  
17  
18

### 19 **Patient involvement**

20  
21 While SSI is the defined primary outcome of this study, several secondary outcomes will be  
22 assessed as well. Patient involvement is crucial in order to define the relevance of outcomes  
23 to patients. A staged approach regarding patient involvement will be employed. During  
24 literature review, all pre-specified outcomes will be considered. After all data are extracted,  
25 available outcomes including how they were collected (e.g. specific quality of life indices) will  
26 be listed. This list will be a basis for a discussion with patient representatives recruited through  
27 the patient organisation Deutsche ILCO e.V. In particular, a focus group discussion with at least  
28 five patient representatives will be conducted. This discussion will serve to rank the subjective  
29 importance of available outcomes to patients. A ranking scale will be devised by the  
30 assignment of points to each outcome by the single participants. Regarding outcomes which  
31 can be measured in multiple ways, such as quality of life, the specific measurement available  
32 from the trials will also be discussed and judged by the patient representatives. After  
33 completion of the analyses, results will be discussed again in the framework of a focus group  
34 discussion with patient representatives from Deutsche ILCO e.V. Similar to the first discussion,  
35 the importance of the results of the single outcomes will be ranked by assigning points in the  
36 light of the specific result. Both rankings will be reported in all presentations of results. It is  
37 planned to present results not only to a scientific audience, but also to patients and their next  
38 of kin through appropriate media and in dedicated settings like information events.  
39  
40  
41  
42  
43  
44  
45

### 46 **Authors' contribution**

47  
48 JF: study concept and design, literature review, protocol draft

49  
50 JAV: study concept and design, development of statistical and machine-learning methods,  
51 protocol draft, final approval of submitted manuscript

52  
53 SES: study concept and design, development of statistical methods, protocol draft, final  
54 approval of submitted manuscript

55  
56 MP: development of statistical methods, final approval of submitted manuscript

57  
58 SZ: development of machine-learning methods, final approval of submitted manuscript

59  
60 JH: study concept and design, literature review, final approval of submitted manuscript



1  
2  
3 JK (Jörg Kleeff): study concept and design, surgical expertise, final approval of submitted  
4 manuscript  
5

6 JK (Johannes Klose): study concept and design, surgical expertise, final approval of submitted  
7 manuscript  
8

9 CM: study concept and design, surgical expertise, final approval of submitted manuscript  
10

11 MK: study concept and design, development of statistical methods, protocol draft, final  
12 approval of submitted manuscript  
13

14 UR: development of research hypothesis, study concept and design, , literature review,  
15 surgical expertise, final approval of submitted manuscript, guarantor of the review  
16  
17

### 18 **Funding statement**

19  
20 This work is supported by the Federal Ministry of Education and Research, grant number:  
21 01KG2106 and by intramural funding (Advanced Clinician Scientist program) of the Medical  
22 Faculty, Martin-Luther-University Halle-Wittenberg.  
23  
24

### 25 **Competing interests statement**

26 None declared.  
27  
28

### 29 **References**

- 30  
31  
32 1 Statistisches Bundesamt (Destatis) - Zentraler Auskunftsdienst. Entgeltsysteme im  
33 Krankenhaus DRG-Statistik und PEPP-Statistik, 2020. [http://www.gbe-](http://www.gbe-bund.de/oowa921-install/servlet/oowa/aw92/dboowasys921.xwdevkit/xwd_init?gbe.isgbetol/xs_start_n eu/&p_aid=i&p_aid=73536844&nummer=662&p_sprache=D&p_indsp=38216866&p_a id=67675748#AKT)  
34 [bund.de/oowa921-](http://www.gbe-bund.de/oowa921-install/servlet/oowa/aw92/dboowasys921.xwdevkit/xwd_init?gbe.isgbetol/xs_start_n eu/&p_aid=i&p_aid=73536844&nummer=662&p_sprache=D&p_indsp=38216866&p_a id=67675748#AKT)  
35 [install/servlet/oowa/aw92/dboowasys921.xwdevkit/xwd\\_init?gbe.isgbetol/xs\\_start\\_n](http://www.gbe-bund.de/oowa921-install/servlet/oowa/aw92/dboowasys921.xwdevkit/xwd_init?gbe.isgbetol/xs_start_n eu/&p_aid=i&p_aid=73536844&nummer=662&p_sprache=D&p_indsp=38216866&p_a id=67675748#AKT)  
36 [eu/&p\\_aid=i&p\\_aid=73536844&nummer=662&p\\_sprache=D&p\\_indsp=38216866&p\\_a](http://www.gbe-bund.de/oowa921-install/servlet/oowa/aw92/dboowasys921.xwdevkit/xwd_init?gbe.isgbetol/xs_start_n eu/&p_aid=i&p_aid=73536844&nummer=662&p_sprache=D&p_indsp=38216866&p_a id=67675748#AKT)  
37 [id=67675748#AKT](http://www.gbe-bund.de/oowa921-install/servlet/oowa/aw92/dboowasys921.xwdevkit/xwd_init?gbe.isgbetol/xs_start_n eu/&p_aid=i&p_aid=73536844&nummer=662&p_sprache=D&p_indsp=38216866&p_a id=67675748#AKT) (accessed 14 May 2020).  
38  
39  
40 2 CDC. National Healthcare Safety Network (NHSN) Patient Safety Component Manual,  
41 2020. [https://www.cdc.gov/nhsn/pdfs/pscmanual/pcsmanual\\_current.pdf](https://www.cdc.gov/nhsn/pdfs/pscmanual/pcsmanual_current.pdf).  
42  
43 3 Nelson RL, Gladman E, Barbateskovic M. Antimicrobial prophylaxis for colorectal  
44 surgery. *Cochrane Database Syst Rev* 2014: Cd001181.  
45  
46 4 Gastmeier P, Brandt C, Sohr D, Babikir R, Mlageni D, Daschner F, et al. Postoperative  
47 Wundinfektionen nach stationären und ambulanten Operationen Ergebnisse aus dem  
48 Krankenhaus-Infektions-Surveillance-System (KISS). *Bundesgesundheitsblatt,*  
49 *Gesundheitsforschung, Gesundheitsschutz* 2004;47: 339–44.  
50  
51 5 Lissovoy G de, Fraeman K, Hutchins V, Murphy D, Song D, Vaughn BB. Surgical site  
52 infection: incidence and impact on hospital utilization and treatment costs. *American*  
53 *journal of infection control* 2009;37: 387–97.  
54  
55 6 Chomsky-Higgins K, Kahn JG. Interventions and Innovation to Prevent Surgical Site  
56 Infection in Colorectal Surgery: A Cost-Effectiveness Analysis. *The Journal of surgical*  
57 *research* 2019;235: 373–82.  
58  
59  
60



- 1
- 2
- 3 7 Dietrich ES, Felder S, Kaier K. Kosten nosokomialer Infektionen. In: Dettenkofer M, Frank U, Just H-M, Lemmen S, Scherrer M, eds. *Praktische Krankenhaushygiene und Umweltschutz*. Berlin, Heidelberg: Springer Berlin Heidelberg, 2018, p. 335–46.
- 4
- 5
- 6
- 7
- 8 8 Rollins KE, Javanmard-Emamghissi H, Lobo DN. Impact of mechanical bowel preparation in elective colorectal surgery: A meta-analysis. *World J Gastroenterol* 2018;24: 519–36.
- 9
- 10
- 11
- 12 9 McSorley ST, Steele CW, McMahon AJ. Meta-analysis of oral antibiotics, in combination with preoperative intravenous antibiotics and mechanical bowel preparation the day before surgery, compared with intravenous antibiotics and mechanical bowel preparation alone to reduce surgical-site infections in elective colorectal surgery. *BJS Open* 2018;2: 185–94.
- 13
- 14
- 15
- 16
- 17
- 18
- 19
- 20 10 WHO. Global Guidelines for the Prevention of Surgical Site Infection 2016.
- 21
- 22 11 Koullouros M, Khan N, Aly EH. The role of oral antibiotics prophylaxis in prevention of surgical site infection in colorectal surgery. *Int J Colorectal Dis* 2017;32: 1–18.
- 23
- 24
- 25 12 Rollins KE, Javanmard-Emamghissi H, Acheson AG, Lobo DN. The Role of Oral Antibiotic Preparation in Elective Colorectal Surgery: A Meta-analysis. *Ann Surg* 2019;270: 43–58.
- 26
- 27
- 28 13 Toh, J. W. T., Phan K, Hitos K, Pathma-Nathan N, El-Khoury T, Richardson AJ, et al. Association of Mechanical Bowel Preparation and Oral Antibiotics Before Elective Colorectal Surgery With Surgical Site Infection: A Network Meta-analysis. *JAMA Netw Open* 2018;1: e183226.
- 29
- 30
- 31
- 32
- 33
- 34 14 Welton NJ, Caldwell DM, Adamopoulos E, Vedhara K. Mixed treatment comparison meta-analysis of complex interventions: psychological interventions in coronary heart disease. *American journal of epidemiology* 2009;169: 1158–65.
- 35
- 36
- 37
- 38
- 39 15 Rücker G. Network meta-analysis, electrical networks and graph theory. *Research synthesis methods* 2012;3: 312–24.
- 40
- 41
- 42 16 Tsafnat G, Glasziou P, Karystianis G, Coiera E. Automated screening of research studies for systematic reviews using study characteristics. *Systematic reviews* 2018;7: 64.
- 43
- 44
- 45 17 Thomas J, McNaught J, Ananiadou S. Applications of text mining within systematic reviews. *Research synthesis methods* 2011;2: 1–14.
- 46
- 47
- 48 18 O'Mara-Eves A, Thomas J, McNaught J, Miwa M, Ananiadou S. Using text mining for study identification in systematic reviews: a systematic review of current approaches. *Systematic reviews* 2015;4: 5.
- 49
- 50
- 51
- 52
- 53 19 Bannach-Brown A, Przybyła P, Thomas J, Rice ASC, Ananiadou S, Liao J, et al. Machine learning algorithms for systematic review: reducing workload in a preclinical review of animal studies and reducing human screening error. *Systematic reviews* 2019;8: 23.
- 54
- 55
- 56
- 57
- 58 20 Friedman J, Hastie T, Tibshirani R. Regularization Paths for Generalized Linear Models via Coordinate Descent. *Journal of statistical software* 2010;33: 1–22.
- 59
- 60

- 1
  - 2
  - 3
  - 4
  - 5
  - 6
  - 7
  - 8
  - 9
  - 10
  - 11
  - 12
  - 13
  - 14
  - 15
  - 16
  - 17
  - 18
  - 19
  - 20
  - 21
  - 22
  - 23
  - 24
  - 25
  - 26
  - 27
  - 28
  - 29
  - 30
  - 31
  - 32
  - 33
  - 34
  - 35
  - 36
  - 37
  - 38
  - 39
  - 40
  - 41
  - 42
  - 43
  - 44
  - 45
  - 46
  - 47
  - 48
  - 49
  - 50
  - 51
  - 52
  - 53
  - 54
  - 55
  - 56
  - 57
  - 58
  - 59
  - 60
- 21 Steinwart I, Christmann A. *Support vector machines*. 1 ed. New York: Springer, 2008.
- 22 Breiman L. *Machine Learning* 2001;45: 5–32.
- 23 Davis J, Goadrich M. The relationship between Precision-Recall and ROC curves. In: Cohen W, ed. *Proceedings of the 23rd international conference on Machine learning*. New York, NY: ACM, 2006, p. 233–40.
- 24 Altena AJ, Spijker R, Leeflang MMG, Olabarriaga SD. Training sample selection: Impact on screening automation in diagnostic test accuracy reviews. *Research synthesis methods* 2021.
- 25 Hutton B, Salanti G, Caldwell DM, Chaimani A, Schmid CH, Cameron C, et al. The PRISMA extension statement for reporting of systematic reviews incorporating network meta-analyses of health care interventions: checklist and explanations. *Annals of internal medicine* 2015;162: 777–84.
- 26 Dindo D, Demartines N, Clavien P-A. Classification of surgical complications: a new proposal with evaluation in a cohort of 6336 patients and results of a survey. *Ann Surg* 2004;240: 205–13.
- 27 Sterne JAC, Savović J, Page MJ, Elbers RG, Blencowe NS, Boutron I, et al. RoB 2: a revised tool for assessing risk of bias in randomised trials. *BMJ (Clinical research ed.)* 2019;366: l4898.
- 28 Rücker G, Petropoulou M, Schwarzer G. Network meta-analysis of multicomponent interventions. *Biometrical journal. Biometrische Zeitschrift* 2020;62: 808–21.
- 29 R Core Team. *R: A language and environment for statistical computing*. Vienna, Austria: R Foundation for Statistical Computing, 2018. <https://www.r-project.org/>.
- 30 Rücker G, Krahn U, König J, Efthimiou O, Schwarzer G. netmeta: Network Meta-Analysis using Frequentist Methods 2020.
- 31 Kuhn M. *Classification and Regression Training [R package caret version 6.0-88]* 2021.
- 32 Wickham H, Averick M, Bryan J, Chang W, McGowan LD'A, François R, et al. Welcome to the Tidyverse. *Journal of Open Source Software* 2019;4: 1686.
- 33 Higgins JPT, Thomas J, Chandler J, Cumpston M, Li T, Page MJ, Welch VA, ed. *Cochrane Handbook for Systematic Reviews of Interventions*. 2 ed. Chichester (UK): John Wiley & Sons, 2019.

1  
2  
3  
4  
5  
6  
7  
8  
9  
10  
11  
12  
13  
14  
15  
16  
17  
18  
19  
20  
21  
22  
23  
24  
25  
26  
27  
28  
29  
30  
31  
32  
33  
34  
35  
36  
37  
38  
39  
40  
41  
42  
43  
44  
45  
46  
47  
48  
49  
50  
51  
52  
53  
54  
55  
56  
57  
58  
59  
60

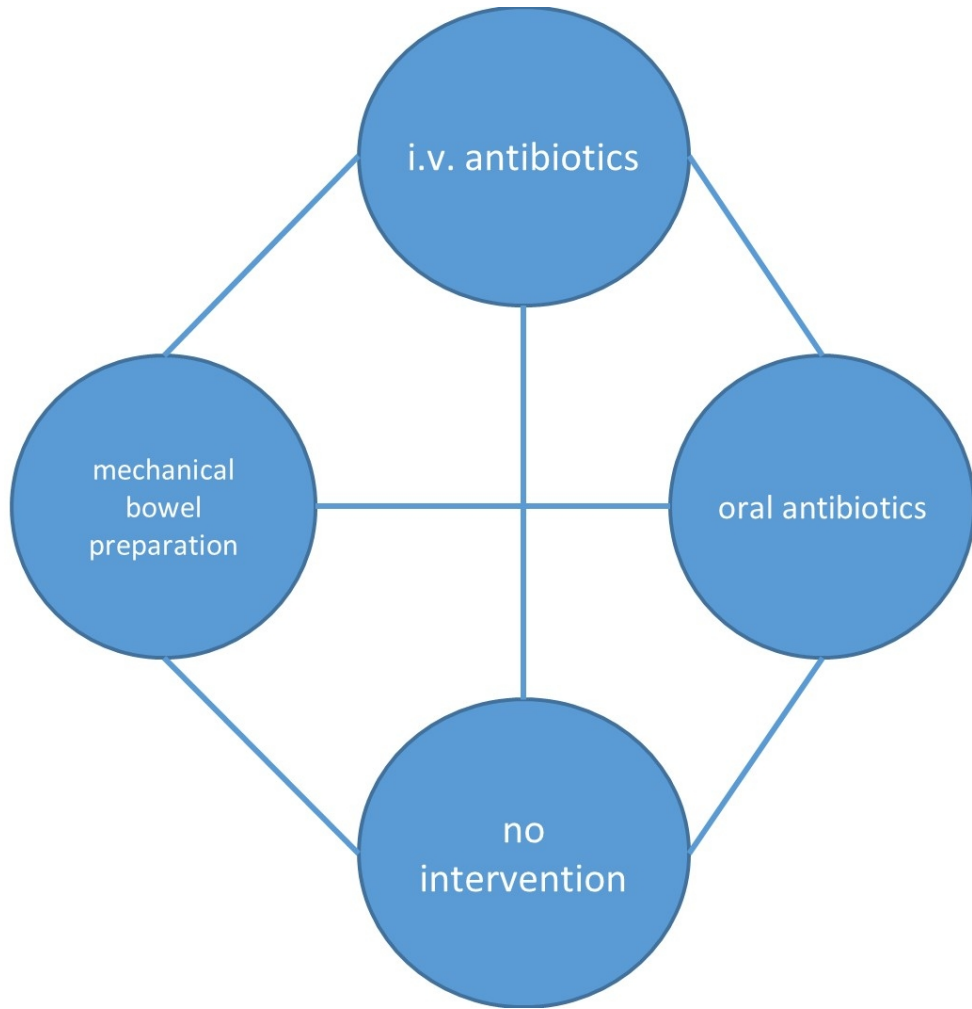

1A\_Network of treatment combinations expected to be identified through the systematic review

1B\_Network of separate components that will be estimated through the CNMA

90x90mm (300 x 300 DPI)

**Systematic literature search**

**Topic**

Interventions to reduce the Incidence of Surgical Site Infection in colorectal resections

**Definition of the main topic concepts**

**P**

|                    |  |
|--------------------|--|
| Colorectal surgery |  |
|--------------------|--|

**I**

|                                    |  |
|------------------------------------|--|
| intravenous antibiotic prophylaxis |  |
| oral antibiotic prophylaxis        |  |
| mechanical bowel preparation       |  |

**O**

|                          |  |
|--------------------------|--|
| Surgical Site Infections |  |
|--------------------------|--|

**Strategy**

|   |               |  |
|---|---------------|--|
| 1 | P             |  |
| 2 | I             |  |
| 3 | O             |  |
| 4 | 1 AND 2 AND 3 |  |

**Databases**

- PubMed
- Cochrane Library
- Web of Science Core Collection
- Clinical Trials.Gov

## PubMed

|    |                                           |  |
|----|-------------------------------------------|--|
| 1  |                                           |  |
| 2  |                                           |  |
| 3  | <b>P</b>                                  |  |
| 4  | "Colorectal Surgery"[Mesh] OR             |  |
| 5  | "Colon/surgery"[Mesh] OR                  |  |
| 6  | Proctolog*[tw] OR                         |  |
| 7  | colectom*[tw] OR                          |  |
| 8  | ((colorect*[tw] OR                        |  |
| 9  | "Colo rect*[tw] OR                        |  |
| 10 | Colon*[tw] OR                             |  |
| 11 | Rectal*[tw] OR                            |  |
| 12 | Rectum*[tw])                              |  |
| 13 | AND                                       |  |
| 14 | ("General Surgery"[Mesh] OR               |  |
| 15 | "Surgical Procedures, Operative"[Mesh] OR |  |
| 16 | Operat*[tw] OR                            |  |
| 17 | Surg*[tw] OR                              |  |
| 18 | Excision*[tw] OR                          |  |
| 19 | Dissection*[tw] OR                        |  |
| 20 | resect*[tw] OR                            |  |
| 21 | removal*[tw] OR                           |  |
| 22 | ectomy[tw] OR                             |  |
| 23 | ectomies[tw] OR                           |  |
| 24 | Postoperat*[tw]))                         |  |
| 25 | <b>I</b>                                  |  |
| 26 | ((("Administration, Oral"[Mesh] OR        |  |
| 27 | "Administration, Intravenous"[Mesh] OR    |  |
| 28 | Oral*[tw] OR                              |  |
| 29 | Mouth*[tw] OR                             |  |
| 30 | Intraven*[tw] OR                          |  |
| 31 | "iv route*[tw])                           |  |
| 32 | AND                                       |  |
| 33 | ("Anti-Bacterial Agents"[Mesh] OR         |  |
| 34 | "Antibiotic Prophylaxis"[Mesh] OR         |  |
| 35 | Antibacter*[tw] OR                        |  |
| 36 | "Anti bacter*[tw] OR                      |  |
| 37 | Antibiotic*[tw] OR                        |  |
| 38 | "single shot"[tw]))                       |  |
| 39 | OR                                        |  |
| 40 | ((bowel*[tw] OR                           |  |
| 41 | intestin*[tw] OR                          |  |
| 42 | gut[tw])                                  |  |
| 43 | AND                                       |  |
| 44 | ("prevention and control"[Subheading] OR  |  |
| 45 | "Cathartics"[Mesh] OR                     |  |
| 46 | prophylax*[tw] OR                         |  |
| 47 | Prevent*[tw] OR                           |  |
| 48 | preparat*[tw] OR                          |  |
| 49 | decontaminat*[tw] OR                      |  |
| 50 | evacuant*[tw] OR                          |  |
| 51 | purgativ*[tw] OR                          |  |
| 52 | cathartic*[tw]))                          |  |
| 53 | <b>O</b>                                  |  |
| 54 | "Surgical Wound Infection"[Mesh] OR       |  |
| 55 | "Site Infecti*[tw] OR                     |  |
| 56 | "Wound Infecti*[tw] OR                    |  |
| 57 | SSI[tw] OR                                |  |
| 58 | "Intraoperative Complications"[Mesh] OR   |  |
| 59 | "Postoperative Complications"[Mesh] OR    |  |
| 60 | "Anastomotic Leak"[Mesh] OR               |  |
|    | "Anastomotic Leak*[tw] OR                 |  |
|    | ((Intraoperative*[tw] OR                  |  |
|    | Postoperative*[tw]))                      |  |

1 AND  
2 Complication\*[tw])

### 3 Search strings

#### 4 P

5 "Colorectal Surgery"[Mesh] OR "Colon/surgery"[Mesh] OR Proctolog\*[tw] OR colectom\*[tw] OR ((colorect\*[tw] OR  
6 "Colo rect\*[tw] OR Colon\*[tw] OR Rectal\*[tw] OR Rectum\*[tw]) AND ("General Surgery"[Mesh] OR "Surgical  
7 Procedures, Operative"[Mesh] OR Operat\*[tw] OR Surg\*[tw] OR Excision\*[tw] OR Dissection\*[tw] OR resect\*[tw]  
8 OR removal\*[tw] OR ectomy[tw] OR ectomies[tw] OR Postoperat\*[tw]))

#### 9 I

10 ((("Administration, Oral"[Mesh] OR "Administration, Intravenous"[Mesh] OR Oral\*[tw] OR Mouth\*[tw] OR  
11 Intraven\*[tw] OR "iv route\*[tw]) AND ("Anti-Bacterial Agents"[Mesh] OR "Antibiotic Prophylaxis"[Mesh] OR  
12 Antibacter\*[tw] OR "Anti bacter\*[tw] OR Antibiotic\*[tw] OR "single shot"[tw])) OR ((bowel\*[tw] OR intestin\*[tw] OR  
13 gut[tw]) AND ("prevention and control" [Subheading] OR "Cathartics"[Mesh] OR prophylax\*[tw] OR Prevent\*[tw] OR  
14 preparat\*[tw] OR decontaminat\*[tw] OR evacuant\*[tw] OR purgativ\*[tw] OR cathartic\*[tw]))

#### 15 O

16 "Surgical Wound Infection"[Mesh] OR "Site Infection\*[tw] OR "Wound Infection\*[tw] OR SSI[tw] OR "Intraoperative  
17 Complications"[Mesh] OR "Postoperative Complications"[Mesh] OR "Anastomotic Leak"[Mesh] OR "Anastomotic  
18 Leak\*[tw] OR ((Intraoperative\*[tw] OR Postoperative\*[tw]) AND Complication\*[tw])

19 1 AND 2 AND 3 ()

### 20 Cochrane Library

#### 21 1. P

22 [mh "Colorectal Surgery"] OR  
23 [mh "Colon"/SU] OR  
24 Proctolog\*:ti,ab,kw OR  
25 colectom\*:ti,ab,kw OR  
26 (colorect\*:ti,ab,kw OR  
27 Colo NEAR/2 rect\*:ti,ab,kw OR  
28 Colon\*:ti,ab,kw OR  
29 Rectal\*:ti,ab,kw OR  
30 Rectum\*:ti,ab,kw)  
31 AND  
32 ([mh "General Surgery"] OR  
33 [mh "Surgical Procedures, Operative"] OR  
34 Operat\*:ti,ab,kw OR  
35 Surg\*:ti,ab,kw OR  
36 Excision\*:ti,ab,kw OR  
37 Dissection\*:ti,ab,kw OR  
38 resect\*:ti,ab,kw OR  
39 removal\*:ti,ab,kw OR  
40 ectomy:ti,ab,kw OR  
41 ectomies:ti,ab,kw OR  
42 Postoperat\*:ti,ab,kw)

#### 22 2. I

23 ([mh "Administration, Oral"] OR  
24 [mh "Administration, Intravenous"] OR  
25 Oral\*:ti,ab,kw OR  
26 Mouth\*:ti,ab,kw OR  
27 Intraven\*:ti,ab,kw OR  
28 iv NEAR/2 route\*:ti,ab,kw)  
29 AND  
30 ([mh "Anti-Bacterial Agents"] OR  
31 [mh "Antibiotic Prophylaxis"] OR  
32 Antibacter\*:ti,ab,kw OR

1 Anti NEAR/2 bacter\*:ti,ab,kw OR  
2 Antibiotic\*:ti,ab,kw OR  
3 "single shot":ti,ab,kw)  
4 OR  
5 (bowel\*:ti,ab,kw OR  
6 intestin\*:ti,ab,kw OR  
7 gut:ti,ab,kw)  
8 AND  
9 ([mh "Cathartics"] OR  
10 prophylax\*:ti,ab,kw OR  
11 Prevent\*:ti,ab,kw OR  
12 preparat\*:ti,ab,kw OR  
13 decontaminat\*:ti,ab,kw OR  
14 evacuant\*:ti,ab,kw OR  
15 purgativ\*:ti,ab,kw OR  
16 cathartic\*:ti,ab,kw)

### 3. O

17  
18 [mh "Surgical Wound Infection"] OR  
19 Site NEAR/2 Infecti\*:ti,ab,kw OR  
20 Wound NEAR/2 Infecti\*:ti,ab,kw OR  
21 SSI:ti,ab,kw OR  
22 [mh "Intraoperative Complications"] OR  
23 [mh "Postoperative Complications"] OR  
24 [mh "Anastomotic Leak"] OR  
25 Anastomotic NEAR/2 Leak\*:ti,ab,kw OR  
26 ((Intraoperative\*:ti,ab,kw OR  
27 Postoperative\*:ti,ab,kw)  
28 AND  
29 Complication\*:ti,ab,kw)

### Search strings

30 (as in the table above)

31  
32  
33 1 AND 2 AND 3  
34  
35  
36  
37  
38  
39  
40  
41  
42  
43  
44  
45  
46  
47  
48  
49  
50  
51  
52  
53  
54  
55  
56  
57  
58  
59  
60



1  
2  
3 **Web of Science Core Collection**

4 **P**

5 Proctolog\* OR  
6 colectom\* OR  
7 ((colorect\* OR  
8 "Colo rect\*" OR  
9 Colon\* OR  
10 Rectal\* OR  
11 Rectum\*)  
12 AND  
13 (Operat\* OR  
14 Surg\* OR  
15 Excision\* OR  
16 Dissection\* OR  
17 resect\* OR  
18 removal\* OR  
19 ectomy OR  
20 ectomies OR  
21 Postoperat\*))

22  
23 **I**

24 (Oral\* OR  
25 Mouth\* OR  
26 Intraven\* OR  
27 "iv route\*")  
28 AND  
29 (Antibacter\* OR  
30 "Anti bacter\*" OR  
31 Antibiotic\* OR  
32 "single shot")  
33 OR  
34 (bowel\* OR  
35 intestin\* OR  
36 gut)  
37 AND  
38 (prophylax\* OR  
39 Prevent\* OR  
40 preparat\* OR  
41 decontaminat\* OR  
42 evacuant\* OR  
43 purgativ\* OR  
44 cathartic\*)

45 **O**

46 "Site Infecti\*" OR  
47 "Wound Infecti\*" OR  
48 "SSI" OR  
49 "Anastomotic Leak\*" OR  
50 ((Intraoperative\* OR  
51 Postoperative\*)  
52 AND  
53 Complication\*)

54  
55 **Search strings**

56 1.  
57 TI=(Proctolog\* OR colectom\* OR ((colorect\* OR "Colo rect\*" OR Colon\* OR Rectal\* OR Rectum\*) AND (Operat\*  
58 OR Surg\* OR Excision\* OR Dissection\* OR resect\* OR removal\* OR ectomy OR ectomies OR Postoperat\*))  
59 OR  
60 AB=(Proctolog\* OR colectom\* OR ((colorect\* OR "Colo rect\*" OR Colon\* OR Rectal\* OR Rectum\*) AND (Operat\*  
OR Surg\* OR Excision\* OR Dissection\* OR resect\* OR removal\* OR ectomy OR ectomies OR Postoperat\*))

1 2.  
2 I  
3 TI=((Oral\* OR Mouth\* OR Intraven\* OR "iv route\*") AND (Antibacter\* OR "Anti bacter\*" OR Antibiotic\* OR "single  
4 shot") OR (bowel\* OR intestin\* OR gut) AND (prophylax\* OR Prevent\* OR preparat\* OR decontaminat\* OR  
5 evacuant\* OR purgativ\* OR cathartic\*))  
6 OR  
7 AB=((Oral\* OR Mouth\* OR Intraven\* OR "iv route\*") AND (Antibacter\* OR "Anti bacter\*" OR Antibiotic\* OR "single  
8 shot") OR (bowel\* OR intestin\* OR gut) AND (prophylax\* OR Prevent\* OR preparat\* OR decontaminat\* OR  
9 evacuant\* OR purgativ\* OR cathartic\*))  
10 3.  
11 O  
12 TI=("Site Infecti\*" OR "Wound Infecti\*" OR "SSI" OR "Anastomotic Leak\*" OR ((Intraoperative\* OR Postoperative\*)  
13 AND Complication\*))  
14 OR  
15 AB=("Site Infecti\*" OR "Wound Infecti\*" OR "SSI" OR "Anastomotic Leak\*" OR ((Intraoperative\* OR Postoperative\*)  
16 AND Complication\*))  
17  
18 4.  
19 1 AND 2 AND 3  
20  
21  
22  
23  
24  
25  
26  
27  
28  
29  
30  
31  
32  
33  
34  
35  
36  
37  
38  
39  
40  
41  
42  
43  
44  
45  
46  
47  
48  
49  
50  
51  
52  
53  
54  
55  
56  
57  
58  
59  
60

**Clinical Trial Gov**

**P**

Proctology OR  
 colectomy OR  
 ((colorectomy OR  
 "Colo rectomy" OR  
 Colon OR  
 Rectal OR  
 Rectum)  
 AND  
 (Operation OR  
 Surgery OR  
 Excision OR  
 Dissection OR  
 resection OR  
 removal OR  
 ectomy OR  
 ectomies OR  
 Postoperative))

**I**

(Oral OR  
 Mouth OR  
 Intravenous OR  
 "iv route")  
 AND  
 (Antibacterial OR  
 "Anti bacterial" OR  
 Antibiotic OR  
 "single shot")  
 OR  
 (bowel OR  
 intestine OR  
 gut)  
 AND  
 (prophylaxis OR  
 Prevention OR  
 preparation OR  
 decontamination OR  
 evacuant OR  
 purgative OR  
 cathartic)

**O**

"Site Infection" OR  
 "Wound Infection" OR  
 SSI OR  
 "Anastomotic Leak" OR  
 ((Intraoperative OR  
 Postoperative)  
 AND  
 Complication)

**Search strings**

|                               |                                                                                                                                                                                                                                                 |
|-------------------------------|-------------------------------------------------------------------------------------------------------------------------------------------------------------------------------------------------------------------------------------------------|
| <p><b>1.</b><br/><b>P</b></p> | <p>(Proctology OR colectomy OR ((colorectomy OR "Colo rectomy" OR Colon OR Rectal OR Rectum) AND (Operation OR Surgery OR Excision OR Dissection OR resection OR removal OR ectomy OR ectomies OR Postoperative)))<br/>                 AND</p> |
| <p><b>2.</b><br/><b>I</b></p> | <p>((Oral OR Mouth OR Intravenous OR "iv route") AND (Antibacterial OR "Anti bacterial" OR Antibiotic OR "single shot") OR (bowel OR intestine OR</p>                                                                                           |

|   |                                                                                  |
|---|----------------------------------------------------------------------------------|
| 1 | gut) AND (prophylaxis OR Prevention OR preparation OR decontamination            |
| 2 | OR evacuant OR purgative OR cathartic))                                          |
| 3 | AND                                                                              |
| 4 | <b>3.</b> ("Site Infection" OR "Wound Infection" OR SSI OR "Anastomotic Leak" OR |
| 5 | <b>0</b> ((Intraoperative OR Postoperative) AND Complication))                   |

4.  
1 AND 2 AND 3

For peer review only

**PRISMA-P (Preferred Reporting Items for Systematic review and Meta-Analysis Protocols) 2015 checklist: recommended items to address in a systematic review protocol\***

| Section and topic                 | Item No | Checklist item                                                                                                                                                                                                                | Page |
|-----------------------------------|---------|-------------------------------------------------------------------------------------------------------------------------------------------------------------------------------------------------------------------------------|------|
| <b>ADMINISTRATIVE INFORMATION</b> |         |                                                                                                                                                                                                                               |      |
| Title:                            |         |                                                                                                                                                                                                                               |      |
| Identification                    | 1a      | Identify the report as a protocol of a systematic review                                                                                                                                                                      | 2    |
| Update                            | 1b      | If the protocol is for an update of a previous systematic review, identify as such                                                                                                                                            | N/A  |
| Registration                      | 2       | If registered, provide the name of the registry (such as PROSPERO) and registration number                                                                                                                                    | 2    |
| Authors:                          |         |                                                                                                                                                                                                                               |      |
| Contact                           | 3a      | Provide name, institutional affiliation, e-mail address of all protocol authors; provide physical mailing address of corresponding author                                                                                     | 1    |
| Contributions                     | 3b      | Describe contributions of protocol authors and identify the guarantor of the review                                                                                                                                           |      |
| Amendments                        | 4       | If the protocol represents an amendment of a previously completed or published protocol, identify as such and list changes; otherwise, state plan for documenting important protocol amendments                               | N/A  |
| Support:                          |         |                                                                                                                                                                                                                               |      |
| Sources                           | 5a      | Indicate sources of financial or other support for the review                                                                                                                                                                 | 11   |
| Sponsor                           | 5b      | Provide name for the review funder and/or sponsor                                                                                                                                                                             | 11   |
| Role of sponsor or funder         | 5c      | Describe roles of funder(s), sponsor(s), and/or institution(s), if any, in developing the protocol                                                                                                                            | N/A  |
| <b>INTRODUCTION</b>               |         |                                                                                                                                                                                                                               |      |
| Rationale                         | 6       | Describe the rationale for the review in the context of what is already known                                                                                                                                                 | 3-4  |
| Objectives                        | 7       | Provide an explicit statement of the question(s) the review will address with reference to participants, interventions, comparators, and outcomes (PICO)                                                                      | 5-7  |
| <b>METHODS</b>                    |         |                                                                                                                                                                                                                               |      |
| Eligibility criteria              | 8       | Specify the study characteristics (such as PICO, study design, setting, time frame) and report characteristics (such as years considered, language, publication status) to be used as criteria for eligibility for the review | 5-7  |
| Information sources               | 9       | Describe all intended information sources (such as electronic databases, contact with study authors, trial registers or other grey literature sources) with planned dates of coverage                                         | 4    |
| Search strategy                   | 10      | Present draft of search strategy to be used for at least one electronic database, including planned limits, such that it could be repeated                                                                                    | -    |

1  
2  
3  
4  
5  
6  
7  
8  
9  
10  
11  
12  
13  
14  
15  
16  
17  
18  
19  
20  
21  
22  
23  
24  
25  
26  
27  
28  
29  
30  
31  
32  
33  
34  
35  
36  
37  
38  
39  
40  
41  
42  
43  
44  
45  
46

|                                    |     |                                                                                                                                                                                                                                                  |     |
|------------------------------------|-----|--------------------------------------------------------------------------------------------------------------------------------------------------------------------------------------------------------------------------------------------------|-----|
| Study records:                     |     |                                                                                                                                                                                                                                                  |     |
| Data management                    | 11a | Describe the mechanism(s) that will be used to manage records and data throughout the review                                                                                                                                                     |     |
| Selection process                  | 11b | State the process that will be used for selecting studies (such as two independent reviewers) through each phase of the review (that is, screening, eligibility and inclusion in meta-analysis)                                                  | 5   |
| Data collection process            | 11c | Describe planned method of extracting data from reports (such as piloting forms, done independently, in duplicate), any processes for obtaining and confirming data from investigators                                                           | 8   |
| Data items                         | 12  | List and define all variables for which data will be sought (such as PICO items, funding sources), any pre-planned data assumptions and simplifications                                                                                          | 8   |
| Outcomes and prioritization        | 13  | List and define all outcomes for which data will be sought, including prioritization of main and additional outcomes, with rationale                                                                                                             | 7   |
| Risk of bias in individual studies | 14  | Describe anticipated methods for assessing risk of bias of individual studies, including whether this will be done at the outcome or study level, or both; state how this information will be used in data synthesis                             | 7-8 |
| Data synthesis                     | 15a | Describe criteria under which study data will be quantitatively synthesised                                                                                                                                                                      | 9   |
|                                    | 15b | If data are appropriate for quantitative synthesis, describe planned summary measures, methods of handling data and methods of combining data from studies, including any planned exploration of consistency (such as $I^2$ , Kendall's $\tau$ ) | 9   |
|                                    | 15c | Describe any proposed additional analyses (such as sensitivity or subgroup analyses, meta-regression)                                                                                                                                            | 9   |
|                                    | 15d | If quantitative synthesis is not appropriate, describe the type of summary planned                                                                                                                                                               | 9   |
| Meta-bias(es)                      | 16  | Specify any planned assessment of meta-bias(es) (such as publication bias across studies, selective reporting within studies)                                                                                                                    | 7-8 |
| Confidence in cumulative evidence  | 17  | Describe how the strength of the body of evidence will be assessed (such as GRADE)                                                                                                                                                               | 9   |

**\* It is strongly recommended that this checklist be read in conjunction with the PRISMA-P Explanation and Elaboration (cite when available) for important clarification on the items. Amendments to a review protocol should be tracked and dated. The copyright for PRISMA-P (including checklist) is held by the PRISMA-P Group and is distributed under a Creative Commons Attribution Licence 4.0.**

*From: Shamseer L, Moher D, Clarke M, Ghersi D, Liberati A, Petticrew M, Shekelle P, Stewart L, PRISMA-P Group. Preferred reporting items for systematic review and meta-analysis protocols (PRISMA-P) 2015: elaboration and explanation. BMJ. 2015 Jan 2;349(jan02 1):g7647.*
