# Supplementary material for: Interventions to reduce the incidence of surgical site infection in colorectal resections: systematic review with multicomponent network meta-analysis (INTRISSI): study protocol
Source: PubMed Central journal article supplement — BMJ Open. 2021 Nov 25;11(11):e057226. doi: 10.1136/bmjopen-2021-057226 (PMC8627408; doi:10.1136/bmjopen-2021-057226), 2021-11-25
Supplement: bmjopen-2021-057226.reviewer_comments.pdf [file bmjopen-2021-057226.reviewer_comments.pdf]

## PEER REVIEW HISTORY

BMJ Open publishes all reviews undertaken for accepted manuscripts. Reviewers are asked to complete a checklist review form (<http://bmjopen.bmj.com/site/about/resources/checklist.pdf>) and are provided with free text boxes to elaborate on their assessment. These free text comments are reproduced below.

### ARTICLE DETAILS

|                            |                                                                                                                                                                                                 |
|----------------------------|-------------------------------------------------------------------------------------------------------------------------------------------------------------------------------------------------|
| <b>TITLE (PROVISIONAL)</b> | Interventions to Reduce the Incidence of Surgical Site Infection in colorectal resections: systematic review with multicomponent network meta-analysis (INTRISSI) – study protocol              |
| <b>AUTHORS</b>             | Friedrichs, Juliane;Seide, Svenja; Vey, Johannes; Zimmermann, Samuel; Hardt, Julia;Kleeff, Joerg;Klose, Johannes;Michalski, Christoph;Kieser, Meinhard;Pilz, Maximilian; Ronellenfitsch, Ulrich |

### VERSION 1 – REVIEW

|                         |                                                                     |
|-------------------------|---------------------------------------------------------------------|
| <b>REVIEWER</b>         | Phang, PT<br>The University of British Columbia Faculty of Medicine |
| <b>REVIEW RETURNED</b>  | 16-Sep-2021                                                         |
| <b>GENERAL COMMENTS</b> | very good proposal                                                  |
