# Supplementary material for: Interventions to reduce the incidence of surgical site infection in colorectal resections: systematic review with multicomponent network meta-analysis (INTRISSI): study protocol
Source: PubMed Central journal article supplement — BMJ Open. 2021 Nov 25;11(11):e057226. doi: 10.1136/bmjopen-2021-057226 (PMC8627408; doi:10.1136/bmjopen-2021-057226), 2021-11-25
Supplement: bmjopen-2021-057226supp001.pdf [file bmjopen-2021-057226supp001.pdf]

**Systematic literature search****Topic**

Interventions to reduce the Incidence of Surgical Site Infection in colorectal resections

**Definition of the main topic concepts****P**

|                    |  |
|--------------------|--|
| Colorectal surgery |  |
|--------------------|--|

**I**

|                                    |  |
|------------------------------------|--|
| intravenous antibiotic prophylaxis |  |
| oral antibiotic prophylaxis        |  |
| mechanical bowel preparation       |  |

**O**

|                          |  |
|--------------------------|--|
| Surgical Site Infections |  |
|--------------------------|--|

**Strategy**

|   |               |  |
|---|---------------|--|
| 1 | P             |  |
| 2 | I             |  |
| 3 | O             |  |
| 4 | 1 AND 2 AND 3 |  |

**Databases**

- PubMed
- Cochrane Library
- Web of Science Core Collection
- Clinical Trials.Gov

## PubMed

## P

|                                                                                                                                                                                                                                                                                                                                                                                                                                                                                                                                                                                                                                                                                    |  |
|------------------------------------------------------------------------------------------------------------------------------------------------------------------------------------------------------------------------------------------------------------------------------------------------------------------------------------------------------------------------------------------------------------------------------------------------------------------------------------------------------------------------------------------------------------------------------------------------------------------------------------------------------------------------------------|--|
| <p><b>"Colorectal Surgery"[Mesh] OR</b><br/> <b>"Colon/surgery"[Mesh] OR</b><br/>         Proctolog*[tw] OR<br/>         colectom*[tw] OR<br/>         ((colorect*[tw] OR<br/>         "Colo rect*[tw] OR<br/>         Colon*[tw] OR<br/>         Rectal*[tw] OR<br/>         Rectum*[tw])<br/>         AND<br/>         ("General Surgery"[Mesh] OR<br/> <b>"Surgical Procedures, Operative"[Mesh] OR</b><br/>         Operat*[tw] OR<br/>         Surg*[tw] OR<br/>         Excision*[tw] OR<br/>         Dissection*[tw] OR<br/>         resect*[tw] OR<br/>         removal*[tw] OR<br/>         ectomy[tw] OR<br/>         ectomies[tw] OR<br/>         Postoperat*[tw]))</p> |  |
|------------------------------------------------------------------------------------------------------------------------------------------------------------------------------------------------------------------------------------------------------------------------------------------------------------------------------------------------------------------------------------------------------------------------------------------------------------------------------------------------------------------------------------------------------------------------------------------------------------------------------------------------------------------------------------|--|

## I

|                                                                                                                                                                                                                                                                                                                                                                                                                                                                              |  |
|------------------------------------------------------------------------------------------------------------------------------------------------------------------------------------------------------------------------------------------------------------------------------------------------------------------------------------------------------------------------------------------------------------------------------------------------------------------------------|--|
| <p>(("Administration, Oral"[Mesh] OR<br/> <b>"Administration, Intravenous"[Mesh] OR</b><br/>         Oral*[tw] OR<br/>         Mouth*[tw] OR<br/>         Intraven*[tw] OR<br/>         "iv route*[tw])<br/>         AND<br/>         ("Anti-Bacterial Agents"[Mesh] OR<br/> <b>"Antibiotic Prophylaxis"[Mesh] OR</b><br/>         Antibacter*[tw] OR<br/>         "Anti bacter*[tw] OR<br/>         Antibiotic*[tw] OR<br/>         "single shot"[tw]))<br/>         OR</p> |  |
| <p>((bowel*[tw] OR<br/>         intestin*[tw] OR<br/>         gut[tw])<br/>         AND<br/>         ("prevention and control"[Subheading] OR<br/> <b>"Cathartics"[Mesh] OR</b><br/>         prophylax*[tw] OR<br/>         Prevent*[tw] OR<br/>         preparat*[tw] OR<br/>         decontaminat*[tw] OR<br/>         evacuant*[tw] OR<br/>         purgativ*[tw] OR<br/>         cathartic*[tw]))</p>                                                                    |  |

## O

|                                                                                                                                                                                                                                                                 |  |
|-----------------------------------------------------------------------------------------------------------------------------------------------------------------------------------------------------------------------------------------------------------------|--|
| <p><b>"Surgical Wound Infection"[Mesh] OR</b><br/>         "Site Infecti*[tw] OR<br/>         "Wound Infecti*[tw] OR<br/>         SSI[tw] OR</p>                                                                                                                |  |
| <p><b>"Intraoperative Complications"[Mesh] OR</b><br/> <b>"Postoperative Complications"[Mesh] OR</b><br/> <b>"Anastomotic Leak"[Mesh] OR</b><br/>         "Anastomotic Leak*[tw] OR<br/>         ((Intraoperative*[tw] OR<br/>         Postoperative*[tw]))</p> |  |

|                           |  |
|---------------------------|--|
| AND<br>Complication*[tw]) |  |
|---------------------------|--|

### Search strings

#### P

"Colorectal Surgery"[Mesh] OR "Colon/surgery"[Mesh] OR Proctolog\*[tw] OR colectom\*[tw] OR ((colorect\*[tw] OR "Colo rect\*[tw] OR Colon\*[tw] OR Rectal\*[tw] OR Rectum\*[tw]) AND ("General Surgery"[Mesh] OR "Surgical Procedures, Operative"[Mesh] OR Operat\*[tw] OR Surg\*[tw] OR Excision\*[tw] OR Dissection\*[tw] OR resect\*[tw] OR removal\*[tw] OR ectomy[tw] OR ectomies[tw] OR Postoperat\*[tw]))

#### I

(("Administration, Oral"[Mesh] OR "Administration, Intravenous"[Mesh] OR Oral\*[tw] OR Mouth\*[tw] OR Intraven\*[tw] OR "iv route\*[tw]) AND ("Anti-Bacterial Agents"[Mesh] OR "Antibiotic Prophylaxis"[Mesh] OR Antibacter\*[tw] OR "Anti bacter\*[tw] OR Antibiotic\*[tw] OR "single shot"[tw])) OR ((bowel\*[tw] OR intestin\*[tw] OR gut[tw]) AND ("prevention and control" [Subheading] OR "Cathartics"[Mesh] OR prophylax\*[tw] OR Prevent\*[tw] OR preparat\*[tw] OR decontaminat\*[tw] OR evacuant\*[tw] OR purgativ\*[tw] OR cathartic\*[tw]))

#### O

"Surgical Wound Infection"[Mesh] OR "Site Infection\*[tw] OR "Wound Infection\*[tw] OR SSI[tw] OR "Intraoperative Complications"[Mesh] OR "Postoperative Complications"[Mesh] OR "Anastomotic Leak"[Mesh] OR "Anastomotic Leak\*[tw] OR ((Intraoperative\*[tw] OR Postoperative\*[tw]) AND Complication\*[tw])

1 AND 2 AND 3 ()

### Cochrane Library

#### 1. P

```
[mh "Colorectal Surgery"] OR
[mh "Colon"/SU] OR
Proctolog*:ti,ab,kw OR
colectom*:ti,ab,kw OR
(colorect*:ti,ab,kw OR
Colo NEAR/2 rect*:ti,ab,kw OR
Colon*:ti,ab,kw OR
Rectal*:ti,ab,kw OR
Rectum*:ti,ab,kw)
AND
([mh "General Surgery"] OR
[mh "Surgical Procedures, Operative"] OR
Operat*:ti,ab,kw OR
Surg*:ti,ab,kw OR
Excision*:ti,ab,kw OR
Dissection*:ti,ab,kw OR
resect*:ti,ab,kw OR
removal*:ti,ab,kw OR
ectomy:ti,ab,kw OR
ectomies:ti,ab,kw OR
Postoperat*:ti,ab,kw)
```

#### 2. I

```
([mh "Administration, Oral"] OR
[mh "Administration, Intravenous"] OR
Oral*:ti,ab,kw OR
Mouth*:ti,ab,kw OR
Intraven*:ti,ab,kw OR
iv NEAR/2 route*:ti,ab,kw)
AND
([mh "Anti-Bacterial Agents"] OR
[mh "Antibiotic Prophylaxis"] OR
Antibacter*:ti,ab,kw OR)
```

Anti NEAR/2 bacter\*:ti,ab,kw OR  
Antibiotic\*:ti,ab,kw OR  
"single shot":ti,ab,kw)  
OR  
(bowel\*:ti,ab,kw OR  
intestin\*:ti,ab,kw OR  
gut:ti,ab,kw)  
AND  
([mh "Cathartics"] OR  
prophylax\*:ti,ab,kw OR  
Prevent\*:ti,ab,kw OR  
preparat\*:ti,ab,kw OR  
decontaminat\*:ti,ab,kw OR  
evacuant\*:ti,ab,kw OR  
purgativ\*:ti,ab,kw OR  
cathartic\*:ti,ab,kw)

### 3. O

[mh "Surgical Wound Infection"] OR  
Site NEAR/2 Infecti\*:ti,ab,kw OR  
Wound NEAR/2 Infecti\*:ti,ab,kw OR  
SSI:ti,ab,kw OR  
[mh "Intraoperative Complications"] OR  
[mh "Postoperative Complications"] OR  
[mh "Anastomotic Leak"] OR  
Anastomotic NEAR/2 Leak\*:ti,ab,kw OR  
((Intraoperative\*:ti,ab,kw OR  
Postoperative\*:ti,ab,kw)  
AND  
Complication\*:ti,ab,kw)

#### Search strings

(as in the table above)

1 AND 2 AND 3

**Web of Science Core Collection****P**

Proctolog\* OR  
 colectom\* OR  
 ((colorect\* OR  
 "Colo rect\*" OR  
 Colon\* OR  
 Rectal\* OR  
 Rectum\*))  
 AND  
 (Operat\* OR  
 Surg\* OR  
 Excision\* OR  
 Dissection\* OR  
 resect\* OR  
 removal\* OR  
 ectomy OR  
 ectomies OR  
 Postoperat\*))

**I**

(Oral\* OR  
 Mouth\* OR  
 Intraven\* OR  
 "iv route\*")  
 AND  
 (Antibacter\* OR  
 "Anti bacter\*" OR  
 Antibiotic\* OR  
 "single shot")  
 OR  
 (bowel\* OR  
 intestin\* OR  
 gut)  
 AND  
 (prophylax\* OR  
 Prevent\* OR  
 preparat\* OR  
 decontaminat\* OR  
 evacuant\* OR  
 purgativ\* OR  
 cathartic\*)

**O**

"Site Infecti\*" OR  
 "Wound Infecti\*" OR  
 "SSI" OR  
 "Anastomotic Leak\*" OR  
 ((Intraoperative\* OR  
 Postoperative\*)  
 AND  
 Complication\*)

**Search strings**

1.

TI=(Proctolog\* OR colectom\* OR ((colorect\* OR "Colo rect\*" OR Colon\* OR Rectal\* OR Rectum\*)) AND (Operat\* OR Surg\* OR Excision\* OR Dissection\* OR resect\* OR removal\* OR ectomy OR ectomies OR Postoperat\*))  
 OR

AB=(Proctolog\* OR colectom\* OR ((colorect\* OR "Colo rect\*" OR Colon\* OR Rectal\* OR Rectum\*)) AND (Operat\* OR Surg\* OR Excision\* OR Dissection\* OR resect\* OR removal\* OR ectomy OR ectomies OR Postoperat\*))

2.

1

TI=((Oral\* OR Mouth\* OR Intraven\* OR "iv route\*") AND (Antibacter\* OR "Anti bacter\*" OR Antibiotic\* OR "single shot") OR (bowel\* OR intestin\* OR gut) AND (prophylax\* OR Prevent\* OR preparat\* OR decontaminat\* OR evacuant\* OR purgativ\* OR cathartic\*))

OR

AB=((Oral\* OR Mouth\* OR Intraven\* OR "iv route\*") AND (Antibacter\* OR "Anti bacter\*" OR Antibiotic\* OR "single shot") OR (bowel\* OR intestin\* OR gut) AND (prophylax\* OR Prevent\* OR preparat\* OR decontaminat\* OR evacuant\* OR purgativ\* OR cathartic\*))

3.

O

TI=("Site Infecti\*" OR "Wound Infecti\*" OR "SSI" OR "Anastomotic Leak\*" OR ((Intraoperative\* OR Postoperative\*) AND Complication\*))

OR

AB=("Site Infecti\*" OR "Wound Infecti\*" OR "SSI" OR "Anastomotic Leak\*" OR ((Intraoperative\* OR Postoperative\*) AND Complication\*))

4.

1 AND 2 AND 3

**Clinical Trial Gov****P**

Proctology OR  
 colectomy OR  
 ((colorectomy OR  
 "Colo rectomy" OR  
 Colon OR  
 Rectal OR  
 Rectum)  
 AND  
 (Operation OR  
 Surgery OR  
 Excision OR  
 Dissection OR  
 resection OR  
 removal OR  
 ectomy OR  
 ectomies OR  
 Postoperative))

**I**

(Oral OR  
 Mouth OR  
 Intravenous OR  
 "iv route")  
 AND  
 (Antibacterial OR  
 "Anti bacterial" OR  
 Antibiotic OR  
 "single shot")  
 OR  
 (bowel OR  
 intestine OR  
 gut)  
 AND  
 (prophylaxis OR  
 Prevention OR  
 preparation OR  
 decontamination OR  
 evacuant OR  
 purgative OR  
 cathartic)

**O**

"Site Infection" OR  
 "Wound Infection" OR  
 SSI OR  
 "Anastomotic Leak" OR  
 ((Intraoperative OR  
 Postoperative)  
 AND  
 Complication)

**Search strings**

|                       |                                                                                                                                                                                                                        |
|-----------------------|------------------------------------------------------------------------------------------------------------------------------------------------------------------------------------------------------------------------|
| <b>1.</b><br><b>P</b> | (Proctology OR colectomy OR ((colorectomy OR "Colo rectomy" OR Colon OR Rectal OR Rectum) AND (Operation OR Surgery OR Excision OR Dissection OR resection OR removal OR ectomy OR ectomies OR Postoperative)))<br>AND |
| <b>2.</b><br><b>I</b> | ((Oral OR Mouth OR Intravenous OR "iv route") AND (Antibacterial OR "Anti bacterial" OR Antibiotic OR "single shot") OR (bowel OR intestine OR                                                                         |

|                       |                                                                                                                              |
|-----------------------|------------------------------------------------------------------------------------------------------------------------------|
|                       | gut) AND (prophylaxis OR Prevention OR preparation OR decontamination OR evacuant OR purgative OR cathartic)<br>AND          |
| <b>3.</b><br><b>O</b> | ("Site Infection" OR "Wound Infection" OR SSI OR "Anastomotic Leak" OR ((Intraoperative OR Postoperative) AND Complication)) |

4.

1 AND 2 AND 3
